# Supplementary material for: A DNA Structural Alphabet Distinguishes Structural Features of DNA Bound to Regulatory Proteins and in the Nucleosome Core Particle
Source: Genes (Basel). 2017 Oct 18;8(10):278. doi: 10.3390/genes8100278 (PMC5664128; doi:10.3390/genes8100278)
Supplement: Supplementary file 1 [file genes-08-00278-s001.xlsx]

## Sheet: Table S1
	Supplement to
	A DNA structural alphabet distinguishes structural features of DNA bound to regulatory proteins and in the nucleosome core particle
	Bohdan Schneider (1)*, Paulína Božíková (1), Petr Čech (2),
	Daniel Svozil (2), Jiří Černý (1)
	(1) Institute of Biotechnology CAS, BIOCEV, Prumyslova 595, CZ-252 50 Vestec, Prague West, Czech Republic
	(2) Laboratory of Informatics and Chemistry, Faculty of Chemical Technology, University of Chemistry and Technology Prague, Technická 5, CZ-166 28 Prague, Czech Republic
	(*) The corresponding author, email bohdan.schneider@gmail.com
	Table S1. Analyzed crystal structures identified by their respective PDB codes: 493 DNA complexes with regulatory proteins and 15 DNA in the nucleosome core particle (NCP).
DNA complexes with regulatory proteins	1A02, 1A0A, 1A1F, 1A1G, 1A1H, 1A1I, 1A1J, 1A1K, 1A1L, 1A3Q, 1A6Y, 1AM9, 1AWC, 1B01, 1B3T, 1B72, 1B8I, 1BC7, 1BC8, 1BDT, 1BF4, 1BF5, 1BG1, 1BL0, 1BVO, 1BY4, 1C9B, 1CF7, 1CKT, 1D3U, 1D5Y, 1DDN, 1DH3, 1DP7, 1DSZ, 1DU0, 1DUX, 1E3O, 1EA4, 1EFA, 1EGW, 1EWQ, 1F2I, 1F4K, 1F5T, 1FJL, 1FYL, 1FZP, 1G2D, 1GD2, 1GJI, 1GT0, 1GU5, 1GXP, 1H6F, 1H89, 1H8A, 1H9D, 1HF0, 1HWT, 1IC8, 1IG7, 1IMH, 1IO4, 1J1V, 1J3E, 1J5…
DNA in NCP	5CPI, 1KX5, 5B0Z, 2F8N, 3WTP, 5B31, 3UTB, 3TU4, 3LZ0, 3LZ1, 5B2J, 5F99, 3LEL, 5CPK, 3UTA

## Sheet: Table S2
		Supplement to
		A DNA structural alphabet distinguishes structural features of DNA bound to regulatory proteins and in the nucleosome core particle
		Bohdan Schneider (1)*, Paulína Božíková (1), Petr Čech (2),
		Daniel Svozil (2), Jiří Černý (1)
		(1) Institute of Biotechnology CAS, BIOCEV, Prumyslova 595, CZ-252 50 Vestec, Prague West, Czech Republic
		(2) Laboratory of Informatics and Chemistry, Faculty of Chemical Technology, University of Chemistry and Technology Prague, Technická 5, CZ-166 28 Prague, Czech Republic
		(*) The corresponding author, email bohdan.schneider@gmail.com
		Table S2. Standardized Pearson residuals (SPR) gauging differences between the four analyzed groups of dinucleotides. Two sets of SPR values were calculated, for contingency tables sorted by the CANA letters (left) and by the sequences (right). The matrix elements can be highlighted by probability values.
		Green fields: first dinucleotide group overpopulated																	Probability used for coloring:
		Blue fields: second dinucleotide group overpopulated															1e-06
	Regulatory vs. histones: Sequence prefrences of the CANA letters																				Regulatory vs. histones: CANA preferences of sequences																				Regulatory vs. histones: Sequence prefrences of the CANA letters, BBB excluded
	Regulatory < 6 Å - Histones < 6 Å		AA	AC	AG	AT	CA	CC	CG	CT	GA	GC	GG	GT	TA	TC	TG	TT			Regulatory < 6 Å - Histones < 6 Å		AA	AC	AG	AT	CA	CC	CG	CT	GA	GC	GG	GT	TA	TC	TG	TT			Regulatory < 6 Å - Histones < 6 Å		AA	AC	AG	AT	CA	CC	CG
		AAA	0.909619	-3.42257	0.633155	-0.625346	0.539961	-0.25503	0.331777	0.859213	0.396182	-3.49675	0.633155	0.575275	1.04089	0.441488	0.371663	-0.140778	AAA			AAA	4.02636	0.851939	2.89289	3.28592	2.58951	3.20576	1.25961	3.24527	2.09983	1.04968	2.72183	2.16669	3.40207	1.84877	1.77117	4.00931	AAA			AAA	0.909619	-3.42257	0.633155	-0.625346	0.539961	-0.25503	0.331777
		A-B	1.0769	-0.189922	1.62246	-3.73051	-0.272103	-0.246321	-1.50711	1.81175	0.0895347	0.813785	0.780138	1.4765	0.35338	1.17764	-1.82895	-0.962429	A-B			A-B	2.21024	0.271608	2.5261	-0.616744	2.35549	0.856068	-0.085477	3.3974	1.78812	1.12846	1.99256	2.31821	1.24019	2.06024	0.914521	1.2062	A-B			A-B	1.0769	-0.189922	1.62246	-3.73051	-0.272103	-0.246321	-1.50711
		B-A	-2.2491	0.42954	0.31609	0.714925	-1.0749	0.0914924	0.107136	-1.49123	0.583027	1.24842	-1.03517	-0.820481	0.77663	0.304543	-0.706788	1.0455	B-A			B-A	0.544174	2.2427	2.47274	4.26624	0.898411	1.75502	0.705782	-0.201876	3.01634	2.932	0.808887	0.637933	1.16099	2.18605	0.998668	3.60634	B-A			B-A	-2.2491	0.42954	0.31609	0.714925	-1.0749	0.0914924	0.107136
		BBB	-1.34085	0.538757	-2.40587	-3.50138	1.34095	1.20051	1.69524	1.91783	0.461722	-0.267617	-0.649774	2.291	3.04806	-0.476215	1.02817	-2.90805	BBB			BBB	0.624501	-1.0518	-1.04897	-1.41989	3.82112	0.211121	0.541103	1.05938	4.56301	-0.916644	-0.332492	0.893029	-0.0607878	-0.934352	3.62259	-2.02318	BBB			2B1	-0.23273	0.0625418	1.18341	-1.55451	1.11513	2.70835	-0.786353
		2B1	-0.23273	0.0625418	1.18341	-1.55451	1.11513	2.70835	-0.786353	1.41284	0.666359	0.339821	0.87991	-0.942649	-0.332621	0.520583	-0.0224581	-2.2477	2B1			2B1	2.50337	1.30794	3.07573	2.87854	2.65034	3.49829	-0.0123485	2.53721	2.76072	1.67818	1.99256	0.501759	0.371109	2.48865	1.92727	2.04532	2B1			3B1	1.36902	1.74434	0.989663	-2.87922	-1.21922	0.989663	0.923773
		3B1	1.36902	1.74434	0.989663	-2.87922	-1.21922	0.989663	0.923773	0.811499	-1.16626	2.1135	-0.359267	-0.680186	-1.59915	-0.212438	0.137682	-0.122493	3B1			3B1	3.14039	2.23797	2.3445	0.89224	0.409275	1.60703	1.16573	1.41499	1.06164	2.9808	0.835233	0.126284	-1.47669	0.955535	1.46717	2.32412	3B1			B12	-1.19358	0.413731	-1.87709	-0.407724	-0.349894	0.193803	3.5755
		B12	-1.19358	0.413731	-1.87709	-0.407724	-0.349894	0.193803	3.5755	0.688863	-4.98829	1.05011	1.41603	-1.13537	3.03062	-0.169816	1.36258	-1.47962	B12			B12	-3.24354	-1.79627	-3.62179	-1.22619	-1.85523	-2.05816	1.08321	-1.07907	-5.64698	-0.913987	-0.558296	-3.69611	-0.318951	-1.65571	-0.166228	-2.6398	B12			BB2	-0.7327	1.99807	-1.30216	0.131789	-0.390979	-4.4423	4.2488
		BB2	-0.7327	1.99807	-1.30216	0.131789	-0.390979	-4.4423	4.2488	-7.99514	1.8142	-1.52021	-0.394313	-1.35324	5.04673	-0.0211806	-0.504965	-1.13203	BB2			BB2	-4.14877	0.31473	-4.17393	-1.14259	-5.24106	-9.50998	0.769652	-14.0493	-0.858357	-6.21427	-4.33432	-3.84432	-1.01406	-1.83973	-4.84385	-2.76231	BB2			miB	-1.34908	2.21201	-0.403571	-3.13126	0.550604	1.96103	0.0521727
		miB	-1.34908	2.21201	-0.403571	-3.13126	0.550604	1.96103	0.0521727	1.61057	-2.54998	2.05482	0.76087	0.222485	0.0380068	2.38842	-2.84259	-1.51617	miB			miB	-5.38197	-3.00592	-3.62924	-7.19478	-2.57714	-1.55647	-4.09333	-2.63746	-5.10881	-1.34534	-2.37701	-3.32316	-4.86114	-1.36767	-6.4767	-5.49428	miB			NAN	-0.0470118	1.07093	1.02631	-2.19624	-1.3713	0.78015	0.685905
		NAN	-0.0470118	1.07093	1.02631	-2.19624	-1.3713	0.78015	0.685905	1.18507	-3.94781	1.50912	1.52709	1.53591	2.74587	-1.69447	-0.299261	-2.7828	NAN			NAN	-0.258115	-1.18328	0.91311	-2.06782	-1.15317	-1.02294	-1.18126	-0.492358	-2.78972	0.473377	0.845338	-0.0831534	-0.0107488	-3.05161	-0.246854	-3.3705	NAN				AA	AC	AG	AT	CA	CC	CG
			AA	AC	AG	AT	CA	CC	CG	CT	GA	GC	GG	GT	TA	TC	TG	TT					AA	AC	AG	AT	CA	CC	CG	CT	GA	GC	GG	GT	TA	TC	TG	TT
	Regulatory no contact - Histones no contact		AA	AC	AG	AT	CA	CC	CG	CT	GA	GC	GG	GT	TA	TC	TG	TT			Regulatory no contact - Histones no contact		AA	AC	AG	AT	CA	CC	CG	CT	GA	GC	GG	GT	TA	TC	TG	TT			Regulatory - Histones, no contact		AA	AC	AG	AT	CA	CC	CG
		AAA	0.702728	-1.91295	0.702728	-0.0320417	-0.992683	-1.53257	1.0068	1.0068	0.702728	1.46285	0.702728	-0.787686	0.702728	1.0068	NaN	0.702728	AAA			AAA	0.597733	-1.61749	0.553216	0.324913	-0.525486	-0.446949	0.933025	1.23119	0.723801	1.55453	0.77775	-0.0943486	0.708584	1.43354	NaN	0.676197	AAA			AAA	0.702728	-1.91295	0.702728	-0.0320417	-0.992683	-1.53257	1.0068
		A-B	-1.34863	0.938898	-1.52318	-0.135655	0.710498	-0.87831	1.218	-0.0270445	0.938898	1.33279	1.33279	0.985536	-1.84169	0.304499	-1.80773	1.05877	A-B			A-B	-2.72895	0.74782	-2.56856	-0.298997	0.0461176	-0.742033	0.518818	-0.442022	0.726408	1.11167	1.10758	1.02827	-2.62125	0.489638	-1.9809	-0.515411	A-B			A-B	-1.34863	0.938898	-1.52318	-0.135655	0.710498	-0.87831	1.218
		B-A	0.244117	-0.0213764	2.29429	0.596091	0.802028	0.872688	-1.62191	-0.316518	1.89145	-0.101082	-1.63661	-4.11954	-0.316518	-1.47358	-0.222315	0.904329	B-A			B-A	0.123674	1.0831	2.07304	2.48378	1.37607	2.27705	-1.51658	0.497165	2.22175	0.937466	-1.03942	-2.34021	0.00733216	0.788744	0.364976	1.26709	B-A			B-A	0.244117	-0.0213764	2.29429	0.596091	0.802028	0.872688	-1.62191
		BBB	4.30703	-1.07651	2.68277	-2.15708	0.174314	-1.49016	1.84	-0.138845	1.25358	-0.64134	2.06636	-3.30844	0.783731	-3.50682	-1.44365	-0.153639	BBB			BBB	3.43977	-0.234043	1.67983	0.699445	1.51202	1.57233	1.99261	2.36395	2.17105	0.638138	3.55161	-0.468964	1.53338	1.19214	0.896063	-0.140768	BBB			2B1	2.80005	-0.742645	1.65284	-0.166845	-0.714633	0.524715	-2.82743
		2B1	2.80005	-0.742645	1.65284	-0.166845	-0.714633	0.524715	-2.82743	-0.0906326	-0.322646	-3.6646	0.794826	0.521739	-1.32133	-0.891212	0.794826	0.210752	2B1			2B1	2.60162	0.0426369	1.49443	1.94889	-0.307687	2.10301	-2.64773	1.14283	0.0575596	-2.89669	1.30595	2.26815	-0.766884	1.85774	1.59158	0.767541	2B1			3B1	3.23429	0.627685	-1.60599	-0.68715	0.594124	-1.67837	0.547378
		3B1	3.23429	0.627685	-1.60599	-0.68715	0.594124	-1.67837	0.547378	0.393512	-2.37883	0.779387	-0.139248	0.274727	0.779387	-1.44053	-0.87262	0.330446	3B1			3B1	2.80397	1.04859	-2.33124	0.830662	1.07094	-0.120146	0.518818	1.33919	-2.17008	1.09119	0.281106	1.85374	0.883525	0.0603722	-0.0441986	0.341956	3B1			B12	-1.60902	-0.0525209	1.27705	-1.19289	0.320116	-1.19585	1.89463
		B12	-1.60902	-0.0525209	1.27705	-1.19289	0.320116	-1.19585	1.89463	-0.383717	-0.12273	-0.317907	1.7396	-0.826634	1.88359	-1.45218	0.0886435	-1.00628	B12			B12	-4.0739	-0.396743	-0.587902	-1.12314	-0.00940591	-0.80465	0.966325	-0.274425	-1.14778	-0.631051	1.38119	-0.514136	1.06071	-0.677284	0.3212	-2.12612	B12			BB2	1.79638	0.971271	-1.22919	0.682177	0.673879	-2.87879	3.02424
		BB2	1.79638	0.971271	-1.22919	0.682177	0.673879	-2.87879	3.02424	-1.99809	1.03274	-1.64342	-0.331143	0.682177	-0.846506	-0.894837	0.350108	-1.64646	BB2			BB2	-0.453884	0.126188	-3.02575	0.327285	-1.74922	-3.24395	1.23338	-2.56757	-0.470645	-2.93946	-1.55449	0.499413	-2.15114	-0.972673	-0.763398	-2.56937	BB2			miB	1.22293	0.662586	-0.0553338	-0.598252	1.6236	-0.696156	-1.30419
		miB	1.22293	0.662586	-0.0553338	-0.598252	1.6236	-0.696156	-1.30419	-1.30419	0.948218	1.80948	-0.464857	-2.39434	0.241366	-1.87704	0.300831	1.18732	miB			miB	-3.45503	-1.66029	-3.48854	-3.11537	-0.561692	-1.39053	-4.43497	-2.78647	-2.24742	0.0386056	-3.15089	-3.53978	-2.82482	-2.89495	-1.91217	-2.51632	miB			NAN	1.28473	0.517768	3.26844	-2.54626	-0.358031	-2.09207	1.14757
		NAN	1.28473	0.517768	3.26844	-2.54626	-0.358031	-2.09207	1.14757	-1.88387	0.652165	0.527038	-1.94551	-0.0695858	2.05295	-3.06141	0.311694	3.32841	NAN			NAN	-1.25961	0.234381	1.87326	-1.60241	-0.0220042	-0.406822	0.44002	-1.04754	0.278703	0.633449	-2.11614	1.20977	1.5962	-0.828411	1.36239	2.40507	NAN				AA	AC	AG	AT	CA	CC	CG
			AA	AC	AG	AT	CA	CC	CG	CT	GA	GC	GG	GT	TA	TC	TG	TT					AA	AC	AG	AT	CA	CC	CG	CT	GA	GC	GG	GT	TA	TC	TG	TT
	Regulatory no contact - Histones < 6 Å		AA	AC	AG	AT	CA	CC	CG	CT	GA	GC	GG	GT	TA	TC	TG	TT			Regulatory no contact - Histones < 6 Å		AA	AC	AG	AT	CA	CC	CG	CT	GA	GC	GG	GT	TA	TC	TG	TT			Regulatory no contact - Histones < 6 Å		AA	AC	AG	AT	CA	CC	CG
		AAA	0.516832	-2.06712	0.516832	-0.571756	0.923605	-0.232311	0.742244	0.742244	0.516832	-0.8508	0.516832	0.742244	0.516832	0.742244	NaN	-1.06035	AAA			AAA	0.922284	-0.758915	1.21464	0.773707	1.95385	1.23602	1.4375	1.41925	1.3083	1.00324	1.18817	1.63592	0.976245	1.44785	NaN	0.00248108	AAA			AAA	0.516832	-2.06712	0.516832	-0.571756	0.923605	-0.232311	0.742244
		A-B	0.558946	-0.0200623	NaN	-2.67245	0.945069	-0.041013	-1.50838	2.43198	-0.608265	1.40436	-0.0285772	1.12481	-2.45489	0.985913	-1.8614	1.58502	A-B			A-B	0.44113	-0.149691	NaN	-2.13261	1.5151	0.345717	-1.35719	2.42991	-0.12403	1.53789	0.354112	1.5727	-2.43699	1.06164	-0.95224	1.56473	A-B			A-B	0.558946	-0.0200623	NaN	-2.67245	0.945069	-0.041013	-1.50838
		B-A	-0.796941	0.801301	0.97968	1.61266	-0.215437	-0.722013	-1.65725	-1.46019	0.861892	1.32364	-2.18856	-3.16027	0.449691	0.0184845	-1.22059	1.29627	B-A			B-A	-0.401118	1.13668	2.57251	3.35354	0.729357	0.561141	-1.39113	-0.898696	2.46992	2.43664	-1.1838	-2.03455	0.769011	0.833546	-0.244506	2.1065	B-A			B-A	-0.796941	0.801301	0.97968	1.61266	-0.215437	-0.722013	-1.65725
		BBB	3.99348	1.66691	-2.10155	-1.85912	-1.20744	-0.0567776	0.338682	1.66764	0.430596	-0.592862	-0.941056	-1.36747	1.87988	0.119961	-2.30987	-0.705016	BBB			BBB	1.21284	-0.158558	-0.856237	-1.7122	-0.880678	0.33491	-0.131986	1.09739	2.94718	-0.76652	0.0696743	-0.903874	0.827702	-0.661779	-0.683911	-2.51087	BBB			2B1	1.92927	-0.322163	0.356044	-0.471324	-0.886452	2.84641	-2.38647
		2B1	1.92927	-0.322163	0.356044	-0.471324	-0.886452	2.84641	-2.38647	1.00862	-0.0702757	-2.67239	0.962658	-0.4956	-0.978303	1.05877	-0.266547	-1.34191	2B1			2B1	2.42458	-0.0228256	1.60454	1.74302	-0.366029	3.82678	-1.97838	1.67269	1.12822	-2.08402	1.96105	1.24287	-0.344985	2.13717	1.13608	0.150033	2B1			3B1	2.10877	2.06677	-0.358836	-2.07939	-0.175542	0.745919	1.08172
		3B1	2.10877	2.06677	-0.358836	-2.07939	-0.175542	0.745919	1.08172	1.37293	-2.5268	0.36382	-0.442633	-0.295725	-1.31953	-1.03201	-0.0400109	0.557981	3B1			3B1	2.27993	2.15047	0.566397	-0.155471	0.743219	1.6199	1.41063	1.88633	-1.4391	0.950507	0.622327	1.26471	-0.933147	-0.444187	1.08803	1.41035	3B1			B12	-1.22037	-0.674706	-0.669863	0.153552	0.0919343	-1.54818	2.41987
		B12	-1.22037	-0.674706	-0.669863	0.153552	0.0919343	-1.54818	2.41987	1.07838	-2.52487	-0.204697	1.35023	-1.69303	2.68147	0.553064	0.55445	1.0111	B12			B12	-3.91969	-2.05813	-1.14283	-0.479123	-1.03486	-2.10777	1.19528	0.0294252	-2.54392	-1.02755	0.810674	-2.15205	0.985657	-0.403081	0.411951	-0.214153	B12			BB2	0.802827	2.61405	-2.05927	0.392304	2.52017	-1.99903	4.7439
		BB2	0.802827	2.61405	-2.05927	0.392304	2.52017	-1.99903	4.7439	-2.76941	-0.568278	-1.47176	-0.606658	0.175615	-1.1064	-0.340694	0.379882	-1.32561	BB2			BB2	-3.47405	0.568658	-3.53482	-0.848706	-2.67792	-4.18039	1.47462	-5.70206	-2.67769	-4.17653	-2.87459	-1.01833	-3.7967	-1.58349	-2.55229	-2.45818	BB2			miB	0.338085	-0.24073	-1.34005	-0.628539	0.659917	-1.02398	-0.789344
		miB	0.338085	-0.24073	-1.34005	-0.628539	0.659917	-1.02398	-0.789344	-1.09726	0.0911517	1.07485	0.966484	-1.02398	1.04303	-0.0205948	0.378988	0.626738	miB			miB	-2.22607	-2.37201	-1.72566	-1.84313	-0.267346	-1.56446	-1.88863	-2.28739	0.0631017	0.154459	0.466972	-1.45714	-0.529757	-1.19825	0.146656	-1.24343	miB			NAN	2.18751	0.609915	0.582115	-1.14359	0.636841	-0.564876	-0.544102
		NAN	2.18751	0.609915	0.582115	-1.14359	0.636841	-0.564876	-0.544102	0.295367	-2.79527	1.44864	-1.55452	0.322574	1.54911	-1.18677	-0.881315	0.485707	NAN			NAN	2.61042	0.754232	3.08639	1.17599	3.12946	1.29276	0.33404	1.28653	0.273372	3.02802	0.359918	2.09145	2.43103	-0.0547267	2.41044	1.7817	NAN				AA	AC	AG	AT	CA	CC	CG
			AA	AC	AG	AT	CA	CC	CG	CT	GA	GC	GG	GT	TA	TC	TG	TT					AA	AC	AG	AT	CA	CC	CG	CT	GA	GC	GG	GT	TA	TC	TG	TT
	Regulatory < 6 Å - Histones no contact		AA	AC	AG	AT	CA	CC	CG	CT	GA	GC	GG	GT	TA	TC	TG	TT			Regulatory < 6 Å - Histones no contact		AA	AC	AG	AT	CA	CC	CG	CT	GA	GC	GG	GT	TA	TC	TG	TT			Regulatory < 6 Å - Histones no contact		AA	AC	AG	AT	CA	CC	CG
		AAA	1.23905	-3.58005	0.862659	0.0237273	-3.35713	-2.1865	0.45211	1.17044	0.53986	0.684815	0.862659	-1.8371	1.41766	0.601584	0.506454	1.36217	AAA			AAA	2.61493	-0.261277	1.31921	2.38828	0.210586	1.65802	0.816135	2.8166	1.16191	1.48914	1.78315	0.629979	2.47211	1.83048	1.22669	2.88953	AAA			AAA	1.23905	-3.58005	0.862659	0.0237273	-3.35713	-2.1865	0.45211
		A-B	-1.49872	0.864131	0.188913	0.626536	-0.55312	-1.52592	1.80919	-1.40104	1.40584	0.77205	1.80307	1.30776	1.1464	0.441216	-1.7008	-1.7008	A-B			A-B	-1.20639	0.959511	-0.619402	1.4271	0.50346	-0.633497	1.44926	0.14205	1.45714	0.814843	1.82435	1.62689	0.596284	1.59881	-0.82175	-1.22884	A-B			A-B	-1.49872	0.864131	0.188913	0.626536	-0.55312	-1.52592	1.80919
		B-A	-0.448441	-0.466468	1.93927	-0.294075	0.458161	1.50242	0.117312	0.0184786	1.70752	-0.388983	-0.361815	-2.14003	-0.146612	-1.56416	0.365937	0.637704	B-A			B-A	0.795051	1.96604	1.88263	3.05542	1.45509	3.16452	0.329406	1.29694	2.29332	1.14989	0.544639	-0.0152488	0.232042	2.12516	1.23235	2.21566	B-A			B-A	-0.448441	-0.466468	1.93927	-0.294075	0.458161	1.50242	0.117312
		BBB	0.937781	-2.62432	3.20415	-3.23535	1.98365	-0.863935	2.60836	-0.330643	1.34523	-0.390865	2.59424	-0.893652	1.31642	-5.04553	1.07699	-1.42331	BBB			BBB	3.23957	-1.00413	1.94919	1.58686	5.10783	1.79913	2.62054	2.56136	2.77329	0.874676	3.85827	1.20833	0.969941	1.5109	4.32015	0.718362	BBB			2B1	1.53014	-0.497791	2.00706	-0.889562	0.867892	0.379591	-1.2836
		2B1	1.53014	-0.497791	2.00706	-0.889562	0.867892	0.379591	-1.2836	0.120391	0.232959	-1.05475	0.698644	0.396074	-0.823711	-1.80292	1.01985	-0.0788464	2B1			2B1	2.55005	1.1624	1.90827	2.75264	1.91322	1.91092	-1.00742	1.87701	0.99829	0.185899	1.23832	1.80002	-0.273275	2.18194	1.97801	2.07594	2B1			3B1	2.71859	0.165172	-0.598783	-0.844275	0.0440355	-2.07172	0.361526
		3B1	2.71859	0.165172	-0.598783	-0.844275	0.0440355	-2.07172	0.361526	-0.262914	-0.871243	1.96329	0.00144951	0.103604	0.981868	-0.801695	-0.919108	-0.262513	3B1			3B1	3.11464	1.03235	-1.54045	1.79459	0.844213	-0.569883	0.244556	0.826604	-0.400195	2.40037	0.336352	1.03533	0.914853	1.50892	0.00845805	0.844979	3B1			B12	-1.62426	0.850296	0.993783	-2.20111	0.0626228	0.353579	2.48287
		B12	-1.62426	0.850296	0.993783	-2.20111	0.0626228	0.353579	2.48287	-1.13236	-0.733993	0.557512	1.72706	0.0943834	1.91654	-2.96542	0.524741	-4.1318	B12			B12	-3.26696	0.376814	-1.63903	-2.04006	-0.274599	0.0966871	0.806705	-1.40814	-2.3684	-0.354457	0.567923	-0.452337	0.10278	-2.09384	-0.1495	-5.30998	B12			BB2	1.05831	0.325112	0.357748	0.542716	-2.16783	-5.69726	2.38075
		BB2	1.05831	0.325112	0.357748	0.542716	-2.16783	-5.69726	2.38075	-5.36181	2.76594	-1.56003	0.00611855	-0.0627144	3.15613	-0.99368	-0.267235	-1.60134	BB2			BB2	0.010428	-0.195155	-1.98292	0.487858	-3.21814	-6.64124	0.690022	-6.05845	1.33259	-3.17336	-1.56951	-0.432835	0.849588	-0.7016	-1.39799	-2.37424	BB2			miB	-0.0699192	3.04542	1.28372	-2.96714	1.70876	2.18313	-0.723812
		miB	-0.0699192	3.04542	1.28372	-2.96714	1.70876	2.18313	-0.723812	1.20309	-1.21075	2.71366	-1.1376	-2.02031	-0.982936	-0.179819	-2.80611	-0.638706	miB			miB	-6.54546	-1.81322	-5.61356	-8.85684	-2.4911	-1.18871	-8.38799	-3.3738	-7.74537	-1.15112	-8.29606	-7.99234	-8.77977	-4.22626	-9.33833	-6.80298	miB			NAN	-0.948207	0.903456	3.64463	-3.93735	-2.47528	-1.12541	2.26858
		NAN	-0.948207	0.903456	3.64463	-3.93735	-2.47528	-1.12541	2.26858	-1.46387	0.6283	0.44631	0.845805	0.97734	3.05342	-4.15327	1.01707	1.28395	NAN			NAN	-4.40668	-1.5793	0.599447	-5.5243	-4.62431	-3.29842	-0.560131	-3.6105	-1.61507	-2.17293	-2.51261	-1.00355	-0.480496	-4.23596	-0.998385	-0.932224	NAN				AA	AC	AG	AT	CA	CC	CG
			AA	AC	AG	AT	CA	CC	CG	CT	GA	GC	GG	GT	TA	TC	TG	TT					AA	AC	AG	AT	CA	CC	CG	CT	GA	GC	GG	GT	TA	TC	TG	TT
	Regulatory < 6 Å - Regulatory no contact		AA	AC	AG	AT	CA	CC	CG	CT	GA	GC	GG	GT	TA	TC	TG	TT			Regulatory < 6 Å - Regulatory no contact		AA	AC	AG	AT	CA	CC	CG	CT	GA	GC	GG	GT	TA	TC	TG	TT			Regulatory < 6 Å - Regulatory no contact		AA	AC	AG	AT	CA	CC	CG
		AAA	1.15322	-0.0248439	0.38904	0.0880103	-1.80276	0.0185611	-2.28517	0.373385	-0.520772	-3.00246	0.38904	-0.704009	1.47123	-1.43772	0.729754	1.37441	AAA			AAA	4.10309	1.63725	1.93128	2.54415	0.928585	2.10613	-0.355398	2.55637	0.949355	-0.176301	1.82327	0.764424	3.16951	0.656817	1.3914	4.0015	AAA			AAA	1.15322	-0.0248439	0.38904	0.0880103	-1.80276	0.0185611	-2.28517
		A-B	0.509016	-0.162784	1.64541	0.821545	-1.73598	-0.190907	0.672207	-1.44623	0.803127	-1.44977	0.821545	0.208183	2.8853	0.0684885	0.896104	-3.78618	A-B			A-B	2.07405	0.477226	2.07678	1.90979	0.546654	0.381136	1.53561	0.765757	1.47139	-0.799733	1.41742	0.57469	3.4259	1.11564	1.67483	-0.783987	A-B			A-B	0.509016	-0.162784	1.64541	0.821545	-1.73598	-0.190907	0.672207
		B-A	-1.19101	-0.686889	-1.15238	-1.6239	-0.862703	1.07997	1.73102	0.552557	-0.596904	-0.416108	1.73124	2.89873	0.319561	0.325145	0.895745	-0.664675	B-A			B-A	1.07424	1.04233	-0.681072	0.359687	-0.0289145	0.963396	1.80913	0.920112	0.122459	0.0882576	1.84693	2.59927	0.308405	1.24206	1.03269	1.42244	B-A			B-A	-1.19101	-0.686889	-1.15238	-1.6239	-0.862703	1.07997	1.73102
		BBB	-6.86893	-1.67898	0.54296	-0.709148	2.62633	1.18308	1.18814	-0.23637	-0.112627	0.501051	0.595525	3.59411	0.640413	-0.599942	3.59892	-1.75139	BBB			BBB	-0.94369	-0.925585	0.157022	0.843182	4.39292	-0.234435	0.700705	-0.383471	0.359294	0.132055	-0.37186	1.88672	-1.19239	-0.0486108	3.70223	1.2435	BBB			2B1	-3.59398	0.526738	0.951825	-1.06323	2.07231	-0.363887	1.94804
		2B1	-3.59398	0.526738	0.951825	-1.06323	2.07231	-0.363887	1.94804	0.345907	0.868163	2.92122	-0.324599	-0.326751	0.971747	-0.992727	0.351712	-0.511512	2B1			2B1	-0.328479	1.46628	1.19558	0.67587	2.55857	-0.680041	1.9883	0.76292	1.28195	3.08184	-0.310907	-1.16358	0.810694	-0.065588	0.44835	1.86769	2B1			3B1	-1.52642	-0.878113	1.50878	-0.0269784	-1.0608	0.134819	-0.435197
		3B1	-1.52642	-0.878113	1.50878	-0.0269784	-1.0608	0.134819	-0.435197	-1.1088	1.96352	2.03324	0.229639	-0.320868	0.26239	1.12273	0.208904	-0.957672	3B1			3B1	0.81001	-0.236938	1.4778	0.991957	-0.551998	-0.41038	-0.596185	-1.0292	2.10751	1.99904	0.00253454	-1.57825	-0.0841644	1.42235	0.0718765	0.670821	3B1			B12	0.506046	1.05018	-0.67074	-0.519891	-0.392338	1.78743	0.581816
		B12	0.506046	1.05018	-0.67074	-0.519891	-0.392338	1.78743	0.581816	-0.682852	-0.659318	1.04949	-0.358521	1.14018	-0.309883	-0.818477	0.484889	-2.66402	B12			B12	1.92157	1.02012	-1.44637	-0.462886	-0.317174	1.07323	-0.469884	-1.11732	-1.08564	0.499423	-1.55568	0.252521	-1.79181	-1.00387	-0.63988	-2.28543	B12			BB2	-1.37333	-1.06091	1.59634	-0.339895	-3.05193	0.0947247	-1.44646
		BB2	-1.37333	-1.06091	1.59634	-0.339895	-3.05193	0.0947247	-1.44646	-0.679776	1.61146	0.793386	0.423963	-1.13096	3.62018	0.347626	-0.727703	0.980244	BB2			BB2	0.763186	-0.46294	1.75931	0.135018	-1.02351	0.0226949	-1.23523	-0.516811	2.38678	1.04044	0.542023	-1.38319	3.48129	0.607397	-0.394497	1.23225	BB2			miB	-1.52496	1.99255	1.15425	-1.8547	-0.273516	2.4241	0.893555
		miB	-1.52496	1.99255	1.15425	-1.8547	-0.273516	2.4241	0.893555	2.30413	-2.27679	0.602778	-0.427177	1.24608	-1.16265	1.91651	-2.9079	-2.02952	miB			miB	-2.07143	0.374144	-0.4813	-3.62538	-1.95636	0.747956	-0.724237	0.763502	-4.43902	-1.49004	-2.82177	-0.447755	-3.87637	0.313689	-5.89013	-3.37952	miB			NAN	-3.20938	0.391589	0.381182	-0.776844	-2.42467	1.56098	1.42643
		NAN	-3.20938	0.391589	0.381182	-0.776844	-2.42467	1.56098	1.42643	0.93444	-0.160216	-0.212361	3.42017	1.30737	1.16989	-0.188819	0.831814	-3.7603	NAN			NAN	-4.07067	-2.43033	-3.17471	-3.52456	-5.43038	-2.73607	-1.64275	-2.32781	-2.64363	-3.82638	0.299447	-3.00789	-3.67554	-2.90447	-3.30418	-6.12247	NAN				AA	AC	AG	AT	CA	CC	CG
			AA	AC	AG	AT	CA	CC	CG	CT	GA	GC	GG	GT	TA	TC	TG	TT					AA	AC	AG	AT	CA	CC	CG	CT	GA	GC	GG	GT	TA	TC	TG	TT
	Histones < 6 Å - Histones no contact		AA	AC	AG	AT	CA	CC	CG	CT	GA	GC	GG	GT	TA	TC	TG	TT			Histones < 6 Å - Histones no contact		AA	AC	AG	AT	CA	CC	CG	CT	GA	GC	GG	GT	TA	TC	TG	TT			Histone < 6 Å - Histones no contact		AA	AC	AG	AT	CA	CC	CG
		AAA	NaN	0.270666	NaN	0.468807	-1.37857	-0.811998	NaN	NaN	NaN	2.0315	NaN	-1.09388	NaN	NaN	NaN	1.39817	AAA			AAA	NaN	-0.865078	NaN	-0.371879	-2.41405	-1.66916	NaN	NaN	NaN	1.01848	NaN	-1.71437	NaN	NaN	NaN	0.675012	AAA			AAA	NaN	0.270666	NaN	0.468807	-1.37857	-0.811998	NaN
		A-B	-1.80556	0.95227	-1.50205	2.43147	-0.20848	-0.831885	2.46099	-2.40634	1.35184	NaN	1.35184	-0.107031	0.677119	-0.677119	0.0273748	-0.49121	A-B			A-B	-2.907	0.831082	-3.12189	1.65456	-1.32418	-1.13587	1.40914	-2.75988	0.784104	NaN	0.928817	-0.404289	-0.310645	-0.597628	-1.3241	-1.87187	A-B			A-B	-1.80556	0.95227	-1.50205	2.43147	-0.20848	-0.831885	2.46099
		B-A	0.81508	-0.653015	1.79702	-0.702653	0.922278	1.32685	0.0333362	0.779038	1.45908	-1.19006	0.290513	-1.07425	-0.671642	-1.39043	0.680308	-0.121015	B-A			B-A	0.408267	0.0801593	1.12807	-0.363318	0.886404	1.8656	-0.145462	1.27771	1.11249	-1.18228	-0.00297631	-0.460865	-0.658631	-0.0409729	0.596435	-0.360192	B-A			B-A	0.81508	-0.653015	1.79702	-0.702653	0.922278	1.32685	0.0333362
		BBB	1.55307	-2.50887	4.06669	-0.696823	1.08959	-1.48961	1.64412	-1.48961	0.963572	-0.185985	2.7226	-2.23808	-0.653915	-3.73798	0.381715	0.390728	BBB			BBB	2.49367	-0.0883436	2.28056	2.27956	2.29298	1.32802	2.0927	1.3743	0.0772069	1.30855	3.65386	0.38046	0.852305	1.87237	1.59092	1.84037	BBB			2B1	1.51907	-0.438915	1.47582	0.204116	0.0538696	-2.38822	-0.455172
		2B1	1.51907	-0.438915	1.47582	0.204116	0.0538696	-2.38822	-0.455172	-0.920532	-0.246959	-1.03448	0.0538696	0.857573	-0.438915	-1.71307	0.946684	1.19922	2B1			2B1	1.1385	0.0605269	0.917236	0.506951	0.0104016	-2.02272	-0.793258	-0.411595	-0.884021	-1.07402	-0.12845	1.28516	-0.464839	-0.281916	0.830264	0.653828	2B1			3B1	2.0557	-1.19264	-1.19264	1.00955	0.707148	-2.21101	-0.388521
		3B1	2.0557	-1.19264	-1.19264	1.00955	0.707148	-2.21101	-0.388521	-0.789028	0.0319895	0.494927	0.22164	0.497391	1.63592	-0.485897	-0.789028	-0.134596	3B1			3B1	1.72883	-0.923989	-3.11542	1.00045	0.521796	-1.72909	-0.638881	-0.411595	-1.03418	0.393875	-0.22539	0.799241	1.50461	0.509239	-1.07627	-0.795251	3B1			B12	-0.640143	0.544465	1.89268	-1.50769	0.268739	0.200016	0.109786
		B12	-0.640143	0.544465	1.89268	-1.50769	0.268739	0.200016	0.109786	-1.44186	2.11056	-0.163668	0.781057	0.72492	-0.163668	-2.20952	-0.40004	-2.10934	B12			B12	-0.711082	1.33703	0.162314	-0.732545	0.888113	1.32431	0.0844852	-0.302908	0.86671	0.25778	0.811762	1.62039	0.277921	-0.281916	-0.0244787	-1.94065	B12			BB2	1.37522	-1.19132	1.01331	0.448369	-1.71771	-1.61301	-0.217087
		BB2	1.37522	-1.19132	1.01331	0.448369	-1.71771	-1.61301	-0.217087	0.990139	1.7548	-0.461979	0.233091	0.632342	0.17216	-0.862796	0.0502391	-0.622698	BB2			BB2	1.98163	-0.380428	0.160003	1.04995	0.574784	1.06836	0.172559	3.43271	1.65017	0.997915	0.993337	1.4197	1.29851	0.688157	1.56845	-0.131313	BB2			miB	1.01292	1.01666	1.4733	0.0133233	1.1053	0.377144	-0.661522
		miB	1.01292	1.01666	1.4733	0.0133233	1.1053	0.377144	-0.661522	-0.28994	0.974525	0.871545	-1.60318	-1.84932	-0.866664	-2.24168	-0.0744642	0.659352	miB			miB	-1.50381	0.489404	-2.23778	-1.53996	-0.350905	0.124577	-2.84842	-0.620855	-2.57623	-0.0936698	-3.90606	-2.57504	-2.32796	-1.80127	-2.29494	-1.44962	miB			NAN	-0.715014	-0.0410212	2.78954	-1.38743	-0.908168	-1.46808	1.5583
		NAN	-0.715014	-0.0410212	2.78954	-1.38743	-0.908168	-1.46808	1.5583	-2.03956	2.927	-0.794494	-0.452726	-0.352618	0.663327	-1.82257	1.05984	2.85227	NAN			NAN	-3.32998	-0.425938	0.160003	-2.78918	-2.83502	-1.70657	0.188114	-2.25915	0.0855317	-2.03288	-2.61921	-0.721156	-0.386754	-0.785366	-0.684257	1.09725	NAN				AA	AC	AG	AT	CA	CC	CG
			AA	AC	AG	AT	CA	CC	CG	CT	GA	GC	GG	GT	TA	TC	TG	TT					AA	AC	AG	AT	CA	CC	CG	CT	GA	GC	GG	GT	TA	TC	TG	TT
		Calculation of statistics between the four groups of nucleotides: To compare the combination BB2/GA for data sets for Regulatory < 6.0 Å and Histones < 6 Å sorted by the CANA letters, we extract data for CANA BB2 from both data sets. The contingency table in this case contains the number of occurrences of BB2/GA (126 and 38), then the sum of the rest of the sequences for this CANA which is 772, t…
		Regulatory vs. histones: Sequence prefrences of the CANA letters
				AA	AC	AG	AT	CA	CC	CG	CT	GA	GC	GG	GT	TA	TC	TG	TT
		Regulatory < 6.0 Å	BB2	60	19	36	13	152	18	79	4	126	50	60	7	142	12	112	8		126	772
		Histones < 6.0 Å	BB2	29	2	21	5	66	26	8	32	38	29	27	6	20	5	50	6		38	332
		Regulatory vs. histones: CANA preferences of sequences
				AAA	A-B	B-A	BBB	2B1	3B1	B12	BB2	miB	NAN
		Regulatory < 6.0 Å	GA	17	26	62	378	50	41	103	126	30	85								126	792
		Histones < 6.0 Å	GA	0	2	4	60	3	7	61	38	27	37								38	201
[truncated: 28 more columns]

## Sheet: Table S3
	Supplement to
	A DNA structural alphabet distinguishes structural features of DNA bound to regulatory proteins and in the nucleosome core particle
	Bohdan Schneider (1)*, Paulína Božíková (1), Petr Čech (2),
	Daniel Svozil (2), Jiří Černý (1)
	(1) Institute of Biotechnology CAS, BIOCEV, Prumyslova 595, CZ-252 50 Vestec, Prague West, Czech Republic
	(2) Laboratory of Informatics and Chemistry, Faculty of Chemical Technology, University of Chemistry and Technology Prague, Technická 5, CZ-166 28 Prague, Czech Republic
	(*) The corresponding author, email bohdan.schneider@gmail.com
	Table S3. The associations between dinucleotide sequences and structures classified as CANA letters as in Table 2 in the main text. The matrix elements in the right column can be highlighted by multiples of the average for the associations, in the right column by probability values as in Table S2. Data are shown for the four analyzed groups of dinucleotides, Regulatory < 6 Å, Histones < 6 Å, Regu…
	Parameters for highlights of incidences: red shows high, blue low numbers of incidences. Multiplied is the average of incidences in each particular table.																		Parameters for highlights of incidences: green shows overpopulted, blue underpopulated CANA/sequence associations. Highlights are adjusted by probability values calculated for each association.
							0.15					2							P-value cutoff:				1e-06		Positive SPR values					Negative SPR values
(a) Regulatory < 6 Å		AA	AC	AG	AT	CA	CC	CG	CT	GA	GC	GG	GT	TA	TC	TG	TT	214.875	AA	AC	AG	AT	CA	CC	CG	CT	GA	GC	GG	GT	TA	TC	TG	TT	16.1156	107.438
	AAA	82	28	42	61	31	87	12	74	17	27	42	35	104	21	15	97	AAA	2.07374	-2.47627	-0.566163	0.0186011	-2.68569	7.13819	-3.64952	4.70842	-3.98719	-2.23415	-0.0249398	-1.55192	5.84556	-3.40637	-5.39892	3.80491	AAA	775
	A-B	34	10	31	42	77	43	66	144	26	8	42	65	110	37	59	59	A-B	-4.88642	-5.7805	-2.86743	-3.26262	3.37953	-0.614506	5.53062	14.4177	-3.05437	-5.77564	-0.680857	2.3502	5.56526	-1.42733	0.307486	-1.93739	A-B	853
	B-A	71	193	79	182	35	119	25	45	62	114	54	99	40	103	32	146	B-A	-4.84477	13.8712	-0.398322	7.47958	-6.08748	5.12631	-4.52881	-4.1971	-1.57702	5.11661	-2.7176	2.15284	-7.2809	3.35616	-6.84502	2.33838	B-A	1399
	BBB	676	259	443	461	399	308	231	344	378	325	359	419	514	373	508	615	BBB	6.22248	-7.64019	3.57938	-3.39566	-1.08483	-3.86552	-3.09078	-2.2777	1.7361	-1.46426	-0.0442749	2.43569	-0.44055	1.03194	4.24934	2.04701	BBB	6612
	2B1	116	104	81	199	49	79	30	90	50	66	42	103	91	121	56	228	2B1	-1.21744	2.2876	-0.871466	8.10595	-5.07371	-0.462541	-4.28963	0.468005	-3.64528	-1.54041	-4.74288	1.83586	-2.77496	4.70836	-4.78853	9.21044	2B1	1505
	3B1	108	86	61	166	33	61	23	56	41	87	48	100	41	69	40	163	3B1	0.744157	2.56411	-1.10656	8.18663	-5.13749	-0.550894	-3.85321	-1.50337	-2.97171	3.40121	-2.17157	4.06743	-5.84787	0.656209	-4.68815	6.35342	3B1	1183
	B12	122	41	75	34	127	49	105	37	103	63	99	35	106	30	134	23	B12	2.253	-3.326	0.685458	-6.5975	6.52919	-2.13557	8.63004	-3.96998	5.33667	0.153152	4.60386	-4.31902	1.41744	-4.53549	6.67037	-8.57951	B12	1183
	BB2	60	19	36	13	152	18	79	4	126	50	60	7	142	12	112	8	BB2	-2.05256	-4.67755	-2.45619	-7.32976	13.4889	-4.72814	7.33096	-6.98591	11.8983	0.467533	1.68614	-6.60224	9.04935	-5.54836	7.17408	-8.55713	BB2	898
	miB	47	69	36	40	51	41	28	50	30	45	35	23	30	58	29	38	miB	-1.22249	5.64756	-0.385017	-1.64208	1.66769	0.90984	0.294068	2.21706	-0.838024	1.97688	-0.0625668	-2.50405	-3.15583	4.02748	-2.29254	-2.66592	miB	650
	NAN	153	156	128	152	127	142	103	138	85	114	154	109	178	107	160	126	NAN	-2.41642	3.65065	0.2444	-1.32766	-0.67408	2.48966	1.86299	1.6159	-2.96977	0.259953	3.8809	-1.42745	0.843102	-0.865739	1.6696	-4.94879	NAN	2132
(b) Histones < 6 Å		AA	AC	AG	AT	CA	CC	CG	CT	GA	GC	GG	GT	TA	TC	TG	TT	37.8375	AA	AC	AG	AT	CA	CC	CG	CT	GA	GC	GG	GT	TA	TC	TG	TT	2.83781	18.9187
	AAA	0	2	0	1	0	1	0	0	0	2	0	0	0	0	0	1	AAA	-0.867134	3.2041	-0.710178	0.430737	-0.768472	1.25221	-0.471589	-0.585481	-0.77554	2.99149	-0.638038	-0.570072	-0.609052	-0.609052	-0.7773	0.441751	AAA	7
	A-B	1	1	0	11	7	4	9	6	2	0	2	2	8	1	9	7	A-B	-2.36219	-1.17781	-2.26958	1.78869	0.7075	0.499117	4.79979	1.57193	-1.58159	-1.87802	-0.976701	-0.645992	2.48349	-1.39267	1.54413	0.169491	A-B	70
	B-A	12	15	6	13	5	10	2	7	4	6	7	11	2	8	4	9	B-A	0.0902923	4.55674	-0.784392	0.470409	-1.52344	2.04405	-0.923451	0.60041	-1.91079	0.142061	0.148501	2.54568	-1.73169	0.817422	-1.92088	-0.760095	B-A	121
	BBB	129	40	97	111	56	43	28	43	60	57	66	51	58	67	76	135	BBB	2.65987	-1.35394	3.3266	0.606509	-4.32389	-1.30662	-1.37909	-1.61414	-3.93809	0.819485	0.784882	0.284277	0.329458	1.88176	-1.75143	3.84764	BBB	1117
	2B1	11	9	4	24	2	0	4	4	3	5	2	12	9	9	5	30	2B1	-0.561997	1.48768	-1.74411	3.42918	-2.75903	-2.55816	-0.0443098	-0.92378	-2.46676	-0.51971	-2.062	2.63526	0.942671	0.942671	-1.82003	5.30728	2B1	133
	3B1	7	4	4	30	6	4	1	4	7	3	6	13	8	8	4	18	3B1	-1.62289	-0.617327	-1.63715	5.53585	-1.30758	-0.746617	-1.5245	-0.82414	-1.01776	-1.26811	-0.384127	3.25182	0.673632	0.673632	-2.03652	1.8758	3B1	127
	B12	42	10	31	11	38	13	10	8	61	13	20	14	13	9	29	11	B12	1.9188	-1.17805	2.01296	-4.09464	2.63693	-0.549995	-0.0777304	-2.07043	7.47614	-0.720137	0.44353	-0.209354	-0.989865	-2.0538	0.558469	-4.04824	B12	333
	BB2	29	2	21	5	66	26	8	32	38	29	27	6	20	5	50	6	BB2	-1.27883	-3.76265	-0.845956	-5.71192	7.72948	2.51165	-1.08289	3.88777	1.80793	3.05538	1.63525	-2.80002	0.360942	-3.45035	4.24388	-5.47908	BB2	370
	miB	30	19	19	37	21	10	13	15	27	11	13	10	14	14	28	26	miB	0.0577847	1.80053	-0.382329	1.59867	-0.637598	-1.1025	1.24482	0.199904	0.616319	-0.968604	-1.0144	-1.05093	-0.390359	-0.390359	0.815383	-0.598871	miB	307
	NAN	32	26	21	45	34	25	18	22	37	16	23	15	20	31	35	42	NAN	-1.87719	1.86956	-1.7783	0.516879	-0.0604937	1.27751	1.31841	0.344698	0.401093	-1.15254	-0.280155	-1.14272	-0.517313	2.07525	-0.00849619	0.0677738	NAN	442
(c) Regulatory no contact		AA	AC	AG	AT	CA	CC	CG	CT	GA	GC	GG	GT	TA	TC	TG	TT	32.475	AA	AC	AG	AT	CA	CC	CG	CT	GA	GC	GG	GT	TA	TC	TG	TT	2.43562	16.2375
	AAA	1	1	1	2	3	3	2	2	1	4	1	2	1	2	0	1	AAA	-1.46979	-0.519708	-0.366824	-0.265809	0.830241	1.83801	1.14344	0.477492	-0.382192	2.51777	-0.201439	0.981303	-0.526565	0.425673	-1.2838	-1.20991	AAA	27
	A-B	2	1	0	2	11	4	4	17	1	2	2	5	1	3	3	14	A-B	-2.65654	-1.6897	-2.03036	-1.8404	2.76904	0.622282	1.00765	6.98301	-1.51484	-0.767591	-0.716084	1.40858	-1.69854	-0.517519	-0.568058	2.34773	A-B	72
	B-A	12	26	13	29	6	10	0	4	9	15	2	2	4	11	2	20	B-A	-2.33732	5.37404	1.54741	4.07597	-1.7676	1.29722	-2.49997	-1.72592	0.0615074	2.79266	-2.10667	-1.80157	-2.04663	0.652011	-2.56825	0.5061	B-A	165
	BBB	168	48	59	72	37	36	26	51	55	43	47	32	68	58	42	105	BBB	5.12444	-1.63618	1.65279	-1.6987	-4.73221	-0.615946	-1.44362	0.0603115	0.784887	-0.21392	0.855484	-0.870106	1.70788	0.98169	-2.10126	0.193191	BBB	947
	2B1	29	11	7	30	1	11	0	10	4	0	6	14	8	19	6	31	2B1	0.949487	-0.118346	-0.971736	3.59289	-3.61093	1.25995	-2.67354	-0.00168794	-2.02566	-3.13741	-0.886367	2.72557	-1.09086	2.86476	-1.52384	2.56853	2B1	187
	3B1	21	15	4	23	7	8	4	11	1	5	6	15	5	6	5	27	3B1	-0.139106	1.72208	-1.66352	2.44076	-1.41696	0.523883	-0.704532	0.819379	-2.77587	-0.995014	-0.523026	3.71397	-1.67946	-1.07301	-1.49594	2.38066	3B1	163
	B12	18	4	15	7	23	3	15	8	20	7	18	3	19	7	20	10	B12	-1.76781	-2.47486	1.52921	-2.72389	2.64247	-1.9071	3.36209	-0.836531	3.11553	-0.764997	3.26218	-1.74466	2.14683	-1.26942	2.80665	-2.73973	B12	197
	BB2	11	4	1	2	31	2	14	1	9	4	6	2	3	1	16	0	BB2	-0.922751	-1.03577	-2.05073	-2.59717	9.05274	-1.19578	5.60949	-2.07289	1.43692	-0.460761	0.562382	-1.07125	-1.46157	-2.12751	4.21891	-3.70085	BB2	107
	miB	19	10	6	18	15	3	5	5	16	10	11	3	12	8	18	18	miB	-1.0192	-0.249053	-1.16142	0.638739	0.770569	-1.68088	-0.455272	-1.54665	2.25945	0.648979	1.13723	-1.52301	0.379231	-0.616147	2.65958	-0.336557	miB	177
	NAN	63	38	31	45	49	27	19	30	23	31	18	21	38	29	36	58	NAN	-1.49882	0.837915	0.359685	-0.71106	1.83878	0.987162	-0.01235	0.0536749	-1.43433	1.1588	-1.62373	-0.0467401	0.792738	-0.379981	0.892908	-0.42604	NAN	556
		AA	AC	AG	AT	CA	CC	CG	CT	GA	GC	GG	GT	TA	TC	TG	TT	19.6375	AA	AC	AG	AT	CA	CC	CG	CT	GA	GC	GG	GT	TA	TC	TG	TT	1.47281	9.81875
(d) Histones no contact	AAA	0	3	0	1	3	4	0	0	0	0	0	2	0	0	0	0	AAA	-1.05522	2.75149	-0.600063	-0.371123	2.12122	3.593	-0.577669	-0.973891	-0.799248	-0.804972	-0.787698	1.50432	-0.838653	-1.17198	-1.01752	-1.08747	AAA	13
	A-B	5	0	2	2	7	6	1	15	0	0	0	2	5	2	8	8	A-B	0.0322988	-1.97346	0.251693	-2.00556	1.08275	1.02222	-0.466111	5.51059	-1.78839	-1.8012	-1.76255	-0.890421	1.04812	-1.74464	1.6728	1.30074	A-B	63
	B-A	4	10	0	9	1	2	1	2	0	6	3	9	2	8	1	5	B-A	-0.446394	3.61872	-1.3427	0.884645	-1.83325	-1.07495	-0.466111	-1.15387	-1.78839	1.84061	0.09457	2.98298	-0.706691	0.888665	-1.7831	-0.099531	B-A	63
	BBB	38	28	12	48	16	24	5	24	18	23	11	32	26	50	27	49	BBB	0.895698	0.948545	0.167352	0.197273	-3.55764	-0.855111	-2.07134	-1.14535	-0.544614	0.720168	-2.30795	1.77834	1.04227	1.76048	-0.987761	2.73689	BBB	431
	2B1	2	6	0	12	1	3	3	4	2	5	1	4	6	10	1	11	2B1	-1.60904	1.06845	-1.4292	1.66586	-2.00964	-0.774775	0.965935	-0.382792	-0.749616	0.949133	-1.29142	-0.0352631	1.31734	1.35386	-1.95719	2.25922	2B1	71
	3B1	0	5	5	13	2	8	1	4	4	1	3	6	1	6	4	11	3B1	-2.56839	0.442716	2.23076	1.89088	-1.62266	1.57435	-0.640657	-0.471427	0.317624	-1.39719	-0.197417	0.902225	-1.49957	-0.413941	-0.647824	2.10787	3B1	74
	B12	21	3	6	9	15	5	4	7	15	6	6	4	6	10	14	11	B12	3.23685	-1.89567	1.20206	-1.82403	1.41124	-1.48133	0.268537	-0.905413	3.51198	-0.286041	-0.176871	-1.56558	-0.49272	-1.04141	1.21793	-0.239683	B12	142
	BB2	5	2	4	1	30	14	3	7	6	11	8	1	6	3	16	3	BB2	-1.55414	-1.95047	0.46629	-3.67865	7.50658	2.4341	0.0128238	-0.415315	0.191302	2.39755	1.17823	-2.40115	-0.0478552	-2.71711	2.63144	-2.38929	BB2	120
	miB	19	11	9	31	12	7	14	14	17	6	19	17	16	24	24	18	miB	-0.304173	-1.02229	0.887618	0.637872	-1.94137	-2.66183	3.32428	-0.925236	1.62132	-1.97772	2.40624	0.650428	0.88652	-0.109184	1.33705	-0.827929	miB	258
	NAN	29	20	4	45	32	28	7	29	11	16	20	13	12	36	20	14	NAN	0.616866	0.315438	-1.90067	1.66486	1.52286	1.60516	-0.530381	1.5525	-1.34842	0.0502837	1.42614	-1.65449	-1.43024	0.867802	-1.08566	-3.08291	NAN	336
		AA	AC	AG	AT	CA	CC	CG	CT	GA	GC	GG	GT	TA	TC	TG	TT		AA	AC	AG	AT	CA	CC	CG	CT	GA	GC	GG	GT	TA	TC	TG	TT		35.9782
		123	88	42	171	119	101	39	106	73	74	71	90	80	149	115	130																			1571
Regulatory < 3.6 Å		AA	AC	AG	AT	CA	CC	CG	CT	GA	GC	GG	GT	TA	TC	TG	TT	165.725	AA	AC	AG	AT	CA	CC	CG	CT	GA	GC	GG	GT	TA	TC	TG	TT	12.4294	82.8625
	AAA	77	25	39	55	25	64	10	66	15	23	38	29	100	15	15	93	AAA	2.89927	-1.98299	-0.263808	0.472898	-1.80997	4.8824	-3.61101	4.97159	-4.01692	-2.41537	-0.243232	-2.38874	6.05633	-3.76661	-5.33104	3.99801	AAA	689
	A-B	27	9	28	37	54	37	60	102	21	6	36	56	100	32	51	49	A-B	-4.36259	-4.87881	-2.22416	-2.35066	3.16501	-0.00175405	6.04727	10.9305	-3.1148	-5.45932	-0.726428	1.75348	5.80457	-0.938235	-0.101946	-2.13192	A-B	705
	B-A	64	138	62	149	26	96	19	35	54	102	45	92	37	81	27	110	B-A	-3.32844	10.833	-0.655782	7.46819	-4.51719	5.04982	-4.33347	-3.6326	-1.31067	5.66378	-2.68239	2.48013	-6.46104	2.85292	-6.70636	0.567165	B-A	1137
	BBB	490	189	333	338	264	227	183	239	314	251	295	339	403	276	431	495	BBB	4.77704	-6.24983	2.61992	-2.91684	0.427175	-3.12541	-2.27671	-2.76783	2.33411	-1.61562	0.378672	1.17462	-1.17618	0.553343	4.08107	1.75248	BBB	5067
	2B1	92	81	58	145	34	65	27	71	38	57	36	91	70	99	52	193	2B1	-0.812422	2.32972	-1.69381	6.18702	-3.80117	0.207177	-3.44911	0.749164	-3.90273	-1.03785	-4.31303	1.72209	-3.33214	4.68227	-4.24042	8.51929	2B1	1209
	3B1	75	63	49	106	20	49	13	38	30	75	41	92	29	60	38	133	3B1	0.0128208	2.29968	-0.680223	4.88108	-4.136	0.180967	-4.22776	-1.71031	-3.14268	3.99749	-1.64825	4.76967	-5.81048	1.78002	-3.79201	5.82977	3B1	911
	B12	86	34	60	21	53	31	75	24	73	49	71	31	79	17	118	14	B12	2.24623	-1.61103	1.63181	-5.67258	1.67364	-2.06463	7.31289	-3.35089	4.06225	0.671347	3.559	-3.25924	1.23113	-4.36474	7.77381	-7.78367	B12	836
	BB2	49	13	32	12	91	11	65	3	111	39	56	6	121	8	91	5	BB2	-1.34816	-4.23647	-1.63535	-6.07579	9.54799	-4.56248	6.92098	-6.05294	11.8917	0.139718	2.51596	-6.21644	8.60968	-5.12689	5.72021	-8.07701	BB2	713
	miB	29	48	21	27	27	29	19	36	21	38	26	18	23	42	25	25	miB	-1.44743	5.14238	-1.1651	-1.29315	0.828143	1.10632	0.0811368	2.41712	-0.922515	2.90344	0.00189164	-2.13795	-2.54929	3.81076	-1.51793	-2.77652	miB	454
	NAN	101	99	99	107	83	87	74	103	66	70	115	91	140	74	124	104	NAN	-2.50488	2.18076	0.974584	-0.882849	0.556469	0.767857	1.47818	2.38423	-2.37499	-1.48337	3.15391	-0.773025	1.2033	-0.921244	1.17775	-3.52287	NAN	1537
		AA	AC	AG	AT	CA	CC	CG	CT	GA	GC	GG	GT	TA	TC	TG	TT		AA	AC	AG	AT	CA	CC	CG	CT	GA	GC	GG	GT	TA	TC	TG	TT		189.828
		1090	699	781	997	677	696	545	717	743	710	759	845	1102	704	972	1221																			13258

## Sheet: Table S4
	Supplement to
	A DNA structural alphabet distinguishes structural features of DNA bound to regulatory proteins and in the nucleosome core particle
	Bohdan Schneider (1)*, Paulína Božíková (1), Petr Čech (2),
	Daniel Svozil (2), Jiří Černý (1)
	(1) Institute of Biotechnology CAS, BIOCEV, Prumyslova 595, CZ-252 50 Vestec, Prague West, Czech Republic
	(2) Laboratory of Informatics and Chemistry, Faculty of Chemical Technology, University of Chemistry and Technology Prague, Technická 5, CZ-166 28 Prague, Czech Republic
	(*) The corresponding author, email bohdan.schneider@gmail.com
	Table S4. Relationship between the helix bending and distribution of the CANA letters. Shown are incidences and percentages of the CANA letters in dinucleotide groups Regulatory < 6 Å and Histone < 6 Å. Shown are data for all dinucleotides and for those dinucleotides that are in DNA segments bent by the specified angle. The local helical bend was calculated by the Curves+ program as the bent-heli…
	Regulatory < 6 Å						Histones < 6 Å
	all < 6 Å		and bend > 4.2°		and bend > 12.6°		all < 6 Å		and bend > 4.2°
CANA	steps	%	steps	%	steps	%	steps	%	steps	%
AAA	775	4.50844	86	6.15165	2	5.88235	7	0.231252	13	0.537634
A-B	853	4.96219	79	5.65093	3	8.82353	70	2.31252	71	2.93631
B-A	1399	8.13845	97	6.93848	2	5.88235	121	3.99736	72	2.97767
BBB	6612	38.4642	455	32.5465	14	41.1765	1117	36.9012	808	33.416
2B1	1505	8.75509	73	5.22175	2	5.88235	133	4.39379	89	3.68073
3B1	1183	6.88191	53	3.79113	1	2.94118	127	4.19557	82	3.39123
B12	1183	6.88191	119	8.51216	0	0	333	11.001	266	11.0008
BB2	898	5.22397	96	6.86695	2	5.88235	370	12.2233	325	13.4409
miB	650	3.78127	61	4.36338	2	5.88235	307	10.1421	269	11.1249
NAN	2132	12.4026	279	19.9571	6	17.6471	442	14.6019	423	17.4938
	17190	100	1398	100	34	100	3027	100	2418	100
			(109 structures)		(24 structures)
Regulatory	steps	%	Histones	steps	%		Selected steps:
AAA	86	6.15165	AAA	13	0.537634		1. in contact (< 6.0 Å from protein)
A-B	79	5.65093	A-B	71	2.93631		2. bend > 4.2°. Theoretical uniform bending in histone ~ 4.5° for - 80 bp for one turn.
B-A	97	6.93848	B-A	72	2.97767		The average from 15 histone structures is 4.26°.
BBB	455	32.5465	BBB	808	33.416		Only 109 of 495 structures from the group of regulatory complexes contain at least one step
2B1	73	5.22175	2B1	89	3.68073		in contact and bending over 4.2°.
3B1	53	3.79113	3B1	82	3.39123
B12	119	8.51216	B12	266	11.0008
BB2	96	6.86695	BB2	325	13.4409
miB	61	4.36338	miB	269	11.1249
NAN	279	19.9571	NAN	423	17.4938
	1398			2418
	Histogram of percentages of the CANA letters of dinucleotide structures in contact (< 6 Å) with histones (red) and with regulatory proteins (blue) that occur in bends larger than 4.2°. The bending was calculated by the Curves+ program as the bending of the local helical axis. Of 495 analyzed structures of DNA in complex with regulatory proteins, only 109 contain at least one step in contact with …

## Sheet: Probabilities
Regulatory vs. histones: Probability values sorted by CANA, all CANA letters considered																				Regulatory vs. histones: Probability values sorted by sequences all CANA letters considered																				Regulatory vs. histones: Probability values sorted by CANA, no BBB CANA letter considered
Regulatory < 6.0 Å - Histones, < 6.0 Å		AA	AC	AG	AT	CA	CC	CG	CT	GA	GC	GG	GT	TA	TC	TG	TT			Regulatory < 6.0 Å - Histones, < 6.0 Å		AA	AC	AG	AT	CA	CC	CG	CT	GA	GC	GG	GT	TA	TC	TG	TT			Regulatory < 6.0 Å - Histones, < 6.0 Å		AA	AC	AG	AT	CA	CC	CG	CT
	AAA	0.771816	0.0149238	1	1	1	1	1	0.833155	1	0.0126963	1	1	0.62992	1	1	1	AAA			AAA	0.000108014	0.573624	0.00737018	0.00184758	0.0187677	0.00241878	0.421289	0.00221989	0.0724212	0.439015	0.0124643	0.0577199	0.00124392	0.12625	0.153643	0.000111232	AAA			AAA	0.771816	0.0149238	1	1	1	1	1	0.833155
	A-B	0.452392	1	0.201459	0.000533597	0.955369	1	0.20069	0.100332	1	0.88618	0.625283	0.216123	0.867205	0.387172	0.111614	0.470806	A-B			A-B	0.0475952	1	0.022475	0.664772	0.0272251	0.528015	1	0.0010945	0.120701	0.540927	0.075476	0.0337143	0.279725	0.0683759	0.453111	0.300728	A-B			A-B	0.452392	1	0.201459	0.000533597	0.955369	1	0.20069	0.100332
	B-A	0.041294	0.770531	0.9125	0.566479	0.43603	1	1	0.218482	0.725926	0.2834	0.42733	0.523723	0.625847	0.90255	0.692687	0.374039	B-A			B-A	0.694189	0.0337638	0.0202333	3.09952e-05	0.490961	0.106642	0.688295	1	0.0042392	0.00526086	0.532098	0.629253	0.367546	0.0411682	0.437998	0.000480257	B-A			B-A	0.041294	0.770531	0.9125	0.566479	0.43603	1	1	0.218482
	BBB	0.197782	0.649194	0.0191589	0.000582589	0.203292	0.261512	0.108413	0.0652317	0.695232	0.846964	0.562712	0.0261942	0.00282399	0.684443	0.333558	0.00432532	BBB			BBB	0.575289	0.344	0.331254	0.176434	0.000180065	0.909905	0.672022	0.334731	7.18428e-06	0.410529	0.805689	0.423889	1	0.397948	0.000384194	0.0502637	BBB			2B1	0.949286	1	0.327336	0.154846	0.392712	0.0125164	0.638998	0.223085
	2B1	0.949286	1	0.327336	0.154846	0.392712	0.0125164	0.638998	0.223085	0.681264	0.906303	0.548402	0.443903	0.885733	0.723899	1	0.0337094	2B1			2B1	0.0173283	0.248722	0.00344479	0.00537092	0.013744	0.000893836	1	0.0175672	0.00968009	0.133854	0.075476	0.726608	0.842081	0.0185694	0.0793822	0.0507737	2B1			3B1	0.228579	0.118817	0.43854	0.00599004	0.344911	0.43854	0.564865	0.556421
	3B1	0.228579	0.118817	0.43854	0.00599004	0.344911	0.43854	0.564865	0.556421	0.358747	0.0537411	0.900985	0.607333	0.176024	0.988878	1	1	3B1			3B1	0.00260497	0.0387468	0.0297338	0.428216	0.843782	0.157364	0.399079	0.224457	0.379099	0.00480037	0.522018	1	0.216652	0.43226	0.205952	0.0266214	3B1			B12	0.274076	0.809011	0.0791813	0.822011	0.802355	0.970333	0.000543494	0.612788
	B12	0.274076	0.809011	0.0791813	0.822011	0.802355	0.970333	0.000543494	0.612788	1.01646e-06	0.363894	0.193359	0.337062	0.00355359	1	0.206787	0.204035	B12			B12	0.00172778	0.115656	0.000491172	0.304117	0.0807148	0.0627726	0.354263	0.395618	2.9753e-08	0.459041	0.67254	0.000519868	0.872631	0.155332	0.955284	0.0162487	B12			BB2	0.540676	0.0790808	0.248875	1	0.757233	1.92402e-05	3.68153e-05	5.75675e-15
	BB2	0.540676	0.0790808	0.248875	1	0.757233	1.92402e-05	3.68153e-05	5.75675e-15	0.0850416	0.163797	0.785525	0.29528	7.26259e-07	1	0.680019	0.402912	BB2			BB2	6.26249e-05	1	6.54943e-05	0.405814	2.68584e-07	1.73105e-20	0.55324	2.78255e-43	0.450695	1.50548e-09	2.93808e-05	0.00064238	0.381058	0.136794	2.20791e-06	0.016584	BB2			miB	0.221791	0.0364223	0.79888	0.00266485	0.674974	0.0707821	1	0.140764
	miB	0.221791	0.0364223	0.79888	0.00266485	0.674974	0.0707821	1	0.140764	0.0162309	0.0564819	0.547021	0.973899	1	0.0239988	0.00701172	0.168339	miB			miB	1.73705e-07	0.00461051	0.000572588	1.90254e-12	0.0155679	0.180236	0.000121118	0.0145	7.77064e-07	0.25212	0.0299481	0.00228827	4.08469e-06	0.233225	3.01491e-10	1.03541e-07	miB			NAN	1	0.332554	0.3605	0.0359098	0.206452	0.500274	0.573815	0.281552
	NAN	1	0.332554	0.3605	0.0359098	0.206452	0.500274	0.573815	0.281552	0.000130861	0.164592	0.154499	0.157397	0.00810162	0.114461	0.841086	0.00742849	NAN			NAN	0.877802	0.2905	0.4261	0.0490625	0.29679	0.370264	0.304108	0.716207	0.00755134	0.736271	0.464969	1	1	0.00349544	0.884872	0.00111498	NAN				AA	AC	AG	AT	CA	CC	CG	CT
		AA	AC	AG	AT	CA	CC	CG	CT	GA	GC	GG	GT	TA	TC	TG	TT					AA	AC	AG	AT	CA	CC	CG	CT	GA	GC	GG	GT	TA	TC	TG	TT
Regulatory - Histones, no contact with protein		AA	AC	AG	AT	CA	CC	CG	CT	GA	GC	GG	GT	TA	TC	TG	TT			Regulatory - Histones, no contact with protein		AA	AC	AG	AT	CA	CC	CG	CT	GA	GC	GG	GT	TA	TC	TG	TT			Regulatory - Histones, no contact with protein		AA	AC	AG	AT	CA	CC	CG	CT
	AAA	1	0.176914	1	1	0.60308	0.276443	0.816275	0.816275	1	0.368007	1	0.821938	1	0.816275	NaN	1	AAA			AAA	1	0.274092	1	1	0.917167	0.950107	0.876424	0.607278	1	0.302082	1	1	1	0.469075	NaN	1	AAA			AAA	1	0.176914	1	1	0.60308	0.276443	0.816275	0.816275
	A-B	0.337256	1	0.418405	1	0.647852	0.583044	0.446509	1	1	0.536053	0.536053	0.550836	0.1547	1	0.135586	0.409248	A-B			A-B	0.0216385	1	0.0837084	1	1	0.676105	0.981466	0.802056	1	0.70445	0.708113	0.520438	0.0290248	0.969294	0.0948346	0.77996	A-B			A-B	0.337256	1	0.418405	1	0.647852	0.583044	0.446509	1
	B-A	1	1	0.0482752	0.691077	0.709317	0.588462	0.616148	1	0.130748	1	0.25806	0.000160671	1	0.227951	1	0.50456	B-A			B-A	1	0.370821	0.0830545	0.0208108	0.324745	0.0477541	0.670103	0.936219	0.0624209	0.484279	0.567368	0.0424408	1	0.581309	1	0.296111	B-A			B-A	1	1	0.0482752	0.691077	0.709317	0.588462	0.616148	1
	BBB	2.3836e-05	0.342497	0.0107306	0.0399719	0.981457	0.177723	0.100158	0.991399	0.261065	0.613354	0.0546474	0.00152237	0.503817	0.000677011	0.190046	0.951018	BBB			BBB	0.000856149	0.928202	0.133727	0.555731	0.174707	0.155835	0.0769792	0.0261449	0.043493	0.629662	0.000702111	0.752697	0.163596	0.284159	0.450382	0.975092	BBB			2B1	0.00971856	0.644294	0.221016	1	1	0.828176	0.0294602	1
	2B1	0.00971856	0.644294	0.221016	1	1	0.828176	0.0294602	1	1	0.00158311	0.7145	0.804023	0.310748	0.502509	0.7145	0.982485	2B1			2B1	0.01682	1	0.298575	0.0744216	1	0.0678265	0.0441076	0.387005	1	0.0151042	0.363523	0.0433762	0.634767	0.0964956	0.228037	0.553733	2B1			3B1	0.00281122	0.707254	0.215232	0.622804	0.820083	0.161802	0.952413	0.915848
	3B1	0.00281122	0.707254	0.215232	0.622804	0.820083	0.161802	0.952413	0.915848	0.0586072	0.738971	1	0.977585	0.738971	0.262345	0.612903	0.889109	3B1			3B1	0.0107569	0.420684	0.0538966	0.513081	0.468658	1	0.981466	0.284504	0.0902972	0.506742	1	0.104798	0.65601	1	1	0.874003	3B1			B12	0.150856	1	0.294309	0.35065	0.884199	0.404708	0.0978583	0.907603
	B12	0.150856	1	0.294309	0.35065	0.884199	0.404708	0.0978583	0.907603	1	0.975043	0.12726	0.660243	0.0943287	0.230147	1	0.436599	B12			B12	0.00010274	1	0.753632	0.386934	1	0.657082	0.486266	0.995621	0.340531	0.73744	0.24777	0.897726	0.402728	0.669121	0.891864	0.0594521	B12			BB2	0.124379	0.577638	0.437615	0.92033	0.600343	0.00881731	0.00557712	0.101518
	BB2	0.124379	0.577638	0.437615	0.92033	0.600343	0.00881731	0.00557712	0.101518	0.444198	0.168881	0.95631	0.92033	0.612995	0.696874	0.873619	0.287193	BB2			BB2	0.868861	1	0.0127542	1	0.109031	0.00284852	0.341883	0.0274685	0.850257	0.00775505	0.204806	1	0.0732758	0.638961	0.566461	0.0517599	BB2			miB	0.293675	0.66362	1	0.657116	0.155215	0.710984	0.286687	0.286687
	miB	0.293675	0.66362	1	0.657116	0.155215	0.710984	0.286687	0.286687	0.444919	0.12109	0.785412	0.0306693	0.96609	0.0910072	0.892136	0.3124	miB			miB	0.00110277	0.154946	0.00152301	0.00306422	0.722344	0.286296	3.11486e-05	0.0109149	0.0405537	1	0.00322444	0.000956427	0.00900913	0.00677677	0.0814216	0.0198903	miB			NAN	0.241546	0.705695	0.00199821	0.0150345	0.812045	0.0513625	0.346099	0.0810098
	NAN	0.241546	0.705695	0.00199821	0.0150345	0.812045	0.0513625	0.346099	0.0810098	0.637122	0.7096	0.0759911	1	0.0570726	0.0034062	0.865592	0.00136679	NAN			NAN	0.259513	0.938065	0.0987586	0.1385	1	0.802945	0.840413	0.369854	0.934843	0.644848	0.0537515	0.307642	0.153381	0.491589	0.226063	0.0234893	NAN				AA	AC	AG	AT	CA	CC	CG	CT
		AA	AC	AG	AT	CA	CC	CG	CT	GA	GC	GG	GT	TA	TC	TG	TT					AA	AC	AG	AT	CA	CC	CG	CT	GA	GC	GG	GT	TA	TC	TG	TT
Regulatory, no contact - Histones, < 6.0 Å		AA	AC	AG	AT	CA	CC	CG	CT	GA	GC	GG	GT	TA	TC	TG	TT			Regulatory, no contact - Histones, < 6.0 Å		AA	AC	AG	AT	CA	CC	CG	CT	GA	GC	GG	GT	TA	TC	TG	TT			Regulatory, no contact - Histones, < 6.0 Å		AA	AC	AG	AT	CA	CC	CG	CT
	AAA	1	0.187023	1	1	0.860353	1	1	1	1	0.76837	1	1	1	1	NaN	0.873628	AAA			AAA	1	0.860608	0.845815	0.848376	0.170542	0.466074	0.467544	0.477935	0.786417	0.555643	0.863607	0.358263	1	0.460386	NaN	1	AAA			AAA	1	0.187023	1	1	0.860353	1	1	1
	A-B	1	1	NaN	0.0172454	0.488426	1	0.223468	0.0275113	0.980327	0.488844	1	0.461041	0.0348213	0.632175	0.118838	0.177467	A-B			A-B	1	1	NaN	0.0643226	0.20328	1	0.284933	0.0269486	1	0.408917	1	0.236205	0.0358489	0.576817	0.515443	0.179477	A-B			A-B	1	1	NaN	0.0172454	0.488426	1	0.223468	0.0275113
	B-A	0.561171	0.528346	0.459675	0.148854	1	0.626004	0.347675	0.250557	0.565566	0.273863	0.0649254	0.0040663	0.974376	1	0.421963	0.272198	B-A			B-A	0.847455	0.333538	0.01971	0.0014151	0.673458	0.744392	0.496546	0.554471	0.0294625	0.0272151	0.400997	0.0808377	0.721345	0.550971	1	0.0553801	B-A			B-A	0.561171	0.528346	0.459675	0.148854	1	0.626004	0.347675	0.250557
	BBB	8.47502e-05	0.11933	0.0435921	0.0748438	0.270912	1	0.841236	0.118357	0.738148	0.624135	0.398687	0.209459	0.0738357	0.978168	0.0267781	0.5247	BBB			BBB	0.257149	0.976283	0.456096	0.105297	0.445966	0.843849	1	0.33163	0.00463662	0.522764	1	0.443973	0.476362	0.586401	0.568464	0.0152669	BBB			2B1	0.0787859	0.929986	0.964308	0.749048	0.765752	0.0112411	0.0606557	0.464575
	2B1	0.0787859	0.929986	0.964308	0.749048	0.765752	0.0112411	0.0606557	0.464575	1	0.0267544	0.548912	0.773332	0.468189	0.390863	1	0.231102	2B1			2B1	0.0237759	1	0.196327	0.109969	1	0.000438137	0.14084	0.16197	0.463798	0.102881	0.110289	0.30188	0.92394	0.0525634	0.411517	0.98841	2B1			3B1	0.0563407	0.0676093	1	0.0540713	1	0.65359	0.530604	0.26885
	3B1	0.0563407	0.0676093	1	0.0540713	1	0.65359	0.530604	0.26885	0.0303512	0.998012	0.88432	0.924037	0.301356	0.449698	1	0.693188	3B1			3B1	0.0369763	0.0559131	0.840173	0.992359	0.646057	0.18627	0.338548	0.105036	0.285278	0.554989	0.746843	0.288726	0.51586	0.864797	0.458776	0.209475	3B1			B12	0.280796	0.693242	0.609892	1	1	0.198608	0.0272524	0.41466
	B12	0.280796	0.693242	0.609892	1	1	0.198608	0.0272524	0.41466	0.0163965	1	0.239583	0.150442	0.0126745	0.771504	0.689674	0.434972	B12			B12	0.000154571	0.0746589	0.326493	0.812116	0.370664	0.0647119	0.327138	1	0.0157812	0.427094	0.526308	0.0577941	0.424308	0.883966	0.799008	1	B12			BB2	0.545299	0.0338719	0.0722386	1	0.0171342	0.0774711	7.38654e-06	0.0106759
	BB2	0.545299	0.0338719	0.0722386	1	0.0171342	0.0774711	7.38654e-06	0.0106759	0.700883	0.209303	0.696253	1	0.395209	1	0.825146	0.404759	BB2			BB2	0.000932291	0.877791	0.00093264	0.641392	0.0104326	6.94866e-05	0.212332	3.45406e-08	0.0118678	6.61341e-05	0.00721967	0.512842	0.000343635	0.241642	0.0158131	0.040583	BB2			miB	0.855859	0.966577	0.259811	0.631332	0.631174	0.464104	0.589218	0.389692
	miB	0.855859	0.966577	0.259811	0.631332	0.631174	0.464104	0.589218	0.389692	1	0.399103	0.453788	0.464104	0.404434	1	0.827363	0.643656	miB			miB	0.0378112	0.0296276	0.130064	0.0892062	0.926986	0.201487	0.100949	0.0398469	1	1	0.802334	0.242629	0.745303	0.328782	1	0.277264	miB			NAN	0.037623	0.631333	0.660849	0.301908	0.602052	0.673389	0.707315	0.879192
	NAN	0.037623	0.631333	0.660849	0.301908	0.602052	0.673389	0.707315	0.879192	0.00778565	0.194208	0.163323	0.879425	0.15768	0.292467	0.448831	0.704249	NAN			NAN	0.0124603	0.540825	0.00335925	0.289469	0.00264807	0.256284	0.880913	0.257277	0.898609	0.00414976	0.85053	0.0563759	0.0222887	1	0.0228885	0.0946123	NAN				AA	AC	AG	AT	CA	CC	CG	CT
		AA	AC	AG	AT	CA	CC	CG	CT	GA	GC	GG	GT	TA	TC	TG	TT					AA	AC	AG	AT	CA	CC	CG	CT	GA	GC	GG	GT	TA	TC	TG	TT
Regulatory, < 6.0 Å - Histone, no contact		AA	AC	AG	AT	CA	CC	CG	CT	GA	GC	GG	GT	TA	TC	TG	TT			Regulatory, < 6.0 Å - Histone, no contact		AA	AC	AG	AT	CA	CC	CG	CT	GA	GC	GG	GT	TA	TC	TG	TT			Regulatory, < 6.0 Å - Histone, no contact		AA	AC	AG	AT	CA	CC	CG	CT
	AAA	0.43475	0.00422632	0.810211	1	0.0076091	0.080295	1	0.48952	1	1	0.810211	0.239562	0.315125	1	1	0.348986	AAA			AAA	0.0164882	1	0.363146	0.0292485	1	0.141797	0.873224	0.00910788	0.490174	0.264215	0.141612	0.744948	0.0248759	0.131442	0.439316	0.00711698	AAA			AAA	0.43475	0.00422632	0.810211	1	0.0076091	0.080295	1	0.48952
	A-B	0.239835	0.813494	1	0.748008	0.743718	0.216528	0.119121	0.219191	0.311178	0.943824	0.135968	0.29049	0.342427	0.906153	0.147035	0.147035	A-B			A-B	0.366636	0.699912	0.867142	0.236036	0.753377	0.699803	0.245061	1	0.281601	0.884543	0.129362	0.162041	0.700728	0.17309	0.545997	0.318085	A-B			A-B	0.239835	0.813494	1	0.748008	0.743718	0.216528	0.119121	0.219191
	B-A	0.875611	0.779295	0.098039	0.91797	0.965994	0.204548	1	1	0.165148	0.877315	0.976763	0.0582473	1	0.186489	1	0.670034	B-A			B-A	0.56628	0.0680159	0.113281	0.00335771	0.241197	0.00269321	1	0.295792	0.0411266	0.33405	0.7807	1	1	0.0477168	0.354403	0.0396027	B-A			B-A	0.875611	0.779295	0.098039	0.91797	0.965994	0.204548	1	1
	BBB	0.392315	0.0124686	0.00191548	0.00169321	0.0603681	0.455274	0.0135023	0.826695	0.215965	0.782416	0.0130344	0.428291	0.221331	7.7757e-07	0.325523	0.180817	BBB			BBB	0.00165971	0.379354	0.0734182	0.133394	5.54858e-07	0.0916737	0.0145264	0.0141547	0.00806927	0.454147	0.000191006	0.272789	0.39467	0.155458	2.43003e-05	0.531771	BBB			2B1	0.193801	0.795265	0.0832636	0.476934	0.602061	0.915444	0.390065	1
	2B1	0.193801	0.795265	0.0832636	0.476934	0.602061	0.915444	0.390065	1	1	0.446066	0.744494	0.877064	0.567965	0.11343	0.487292	1	2B1			2B1	0.0177453	0.326907	0.106817	0.00840809	0.0946138	0.086155	0.542757	0.0900639	0.468081	1	0.350285	0.10622	0.96486	0.0406777	0.0813914	0.0515803	2B1			3B1	0.0122523	1	0.741276	0.501056	1	0.0705011	1	1
	3B1	0.0122523	1	0.741276	0.501056	1	0.0705011	1	1	0.58317	0.0839029	1	1	0.516676	0.583176	0.553104	0.929064	3B1			3B1	0.00341142	0.40417	0.22419	0.0951881	0.577371	0.719711	1	0.546733	0.913874	0.0285572	0.955517	0.395345	0.566342	0.181756	1	0.485909	3B1			B12	0.138568	0.546865	0.418844	0.0511154	1	0.897366	0.0202731	0.376413
	B12	0.138568	0.546865	0.418844	0.0511154	1	0.897366	0.0202731	0.376413	0.563205	0.720608	0.118132	1	0.0789336	0.00681208	0.701151	0.000117652	B12			B12	0.0019169	0.921485	0.179136	0.0726224	0.900453	1	0.565648	0.250703	0.0292082	0.905372	0.713911	0.875495	1	0.0628536	1	6.04272e-07	B12			BB2	0.390047	1	0.914298	0.900182	0.0412507	6.002e-08	0.0276528	9.99448e-07
	BB2	0.390047	1	0.914298	0.900182	0.0412507	6.002e-08	0.0276528	9.99448e-07	0.00876002	0.175332	1	1	0.0025423	0.55496	0.903961	0.257937	BB2			BB2	1	1	0.116216	0.949871	0.00204578	2.34217e-10	0.668787	2.89832e-08	0.248644	0.00345667	0.185392	1	0.509009	0.745468	0.216425	0.0694604	BB2			miB	1	0.0035498	0.265193	0.00465332	0.117825	0.0435176	0.583248	0.289439
	miB	1	0.0035498	0.265193	0.00465332	0.117825	0.0435176	0.583248	0.289439	0.29617	0.0106534	0.326083	0.0656184	0.414974	0.958961	0.00806882	0.627132	miB			miB	2.78989e-10	0.108917	1.75004e-07	4.5372e-18	0.0229312	0.348064	9.57055e-16	0.00159647	8.69791e-14	0.378972	1.03222e-15	1.3578e-14	2.83715e-17	4.91365e-05	9.48727e-20	5.68473e-11	miB			NAN	0.403203	0.42987	0.000441096	0.000128631	0.018486	0.312721	0.033473	0.177972
	NAN	0.403203	0.42987	0.000441096	0.000128631	0.018486	0.312721	0.033473	0.177972	0.633708	0.752815	0.464681	0.399815	0.00324709	5.63365e-05	0.365888	0.247243	NAN			NAN	2.05176e-05	0.152697	0.717678	6.53784e-08	7.39915e-06	0.00159701	0.742328	0.000523006	0.158686	0.0460207	0.01878	0.406916	0.756018	4.02927e-05	0.390555	0.44192	NAN				AA	AC	AG	AT	CA	CC	CG	CT
		AA	AC	AG	AT	CA	CC	CG	CT	GA	GC	GG	GT	TA	TC	TG	TT					AA	AC	AG	AT	CA	CC	CG	CT	GA	GC	GG	GT	TA	TC	TG	TT
Regulatory, < 6.0 Å - Regulatory, no contact		AA	AC	AG	AT	CA	CC	CG	CT	GA	GC	GG	GT	TA	TC	TG	TT			Regulatory, < 6.0 Å - Regulatory, no contact		AA	AC	AG	AT	CA	CC	CG	CT	GA	GC	GG	GT	TA	TC	TG	TT			Regulatory, < 6.0 Å - Regulatory, no contact		AA	AC	AG	AT	CA	CC	CG	CT
	AAA	0.40549	1	1	1	0.187861	1	0.124114	0.968753	1	0.0126075	1	0.812358	0.237588	0.394644	0.994249	0.282139	AAA			AAA	7.57007e-05	0.172375	0.0913061	0.0182907	0.496137	0.0548741	1	0.0176671	0.551028	1	0.11586	0.63739	0.00269639	0.72897	0.326346	0.000114932	AAA			AAA	0.40549	1	1	1	0.187861	1	0.124114	0.968753
	A-B	0.847947	1	0.192077	0.593856	0.126801	1	0.659796	0.199007	0.660947	0.391783	0.593856	1	0.00700777	1	0.515225	0.000372859	A-B			A-B	0.0629743	0.966885	0.0725187	0.0904525	0.696821	0.893341	0.181053	0.524415	0.236828	0.757831	0.241001	0.719312	0.00109443	0.379351	0.141449	0.534896	A-B			A-B	0.847947	1	0.192077	0.593856	0.126801	1	0.659796	0.199007
	B-A	0.313734	0.56984	0.328339	0.132729	0.545106	0.352185	0.160658	0.751769	0.689746	0.789854	0.131112	0.00630901	0.943669	0.867509	0.53953	0.595379	B-A			B-A	0.351881	0.350288	0.607701	0.798852	1	0.419206	0.136869	0.484873	1	1	0.103415	0.0156386	0.9531	0.272799	0.44741	0.189859	B-A			B-A	0.313734	0.56984	0.328339	0.132729	0.545106	0.352185	0.160658	0.751769
	BBB	9.50746e-12	0.111616	0.636077	0.521335	0.0107163	0.271451	0.274711	0.874215	0.969792	0.674247	0.604132	0.000430308	0.565125	0.599569	0.000412367	0.090605	BBB			BBB	0.376885	0.406932	0.947973	0.442639	1.64109e-05	0.899986	0.561524	0.772873	0.789657	0.975082	0.786284	0.0751292	0.26863	1	0.000301641	0.238979	BBB			2B1	0.000549312	0.709369	0.437025	0.342162	0.065274	0.848422	0.0980724	0.855972
	2B1	0.000549312	0.709369	0.437025	0.342162	0.065274	0.848422	0.0980724	0.855972	0.517242	0.00650883	0.927424	0.861911	0.419916	0.394213	0.884421	0.686331	2B1			2B1	0.827373	0.185255	0.305635	0.565593	0.0185965	0.61879	0.0903066	0.545874	0.282257	0.00391373	0.939467	0.32067	0.521458	1	0.80728	0.0757678	2B1			3B1	0.166201	0.471803	0.188872	1	0.415193	1	0.890838	0.359287
	3B1	0.166201	0.471803	0.188872	1	0.415193	1	0.890838	0.359287	0.0848419	0.0618039	0.986625	0.863889	0.974108	0.346901	1	0.402202	3B1			3B1	0.487987	0.930712	0.200275	0.37775	0.746177	0.838188	0.774617	0.401997	0.0608556	0.0672468	1	0.159591	1	0.212544	1	0.571483	3B1			B12	0.704977	0.404535	0.606615	0.769308	0.788142	0.112881	0.656127	0.641056
	B12	0.704977	0.404535	0.606615	0.769308	0.788142	0.112881	0.656127	0.641056	0.600081	0.382034	0.825562	0.365437	0.86043	0.561721	0.716835	0.0158576	B12			B12	0.0703923	0.422941	0.201615	0.81146	0.846497	0.402166	0.754236	0.375357	0.345309	0.758147	0.161594	1	0.101113	0.448287	0.613529	0.0408413	B12			BB2	0.240489	0.472168	0.185242	1	0.00350673	1	0.204086	1
	BB2	0.240489	0.472168	0.185242	1	0.00350673	1	0.204086	1	0.143876	0.570981	0.827797	0.556421	0.000511529	1	0.565753	0.685618	BB2			BB2	0.542661	0.872898	0.133234	1	0.362863	1	0.288887	1	0.0244211	0.40982	0.733991	0.423802	0.000841347	0.843228	0.803935	0.454672	BB2			miB	0.171147	0.0645543	0.336466	0.0912764	0.906792	0.0254024	0.498422	0.032843
	miB	0.171147	0.0645543	0.336466	0.0912764	0.906792	0.0254024	0.498422	0.032843	0.0364539	0.665275	0.808612	0.315787	0.332258	0.0783949	0.00643395	0.0627718	miB			miB	0.0559375	0.83652	0.811299	0.000591011	0.0756171	0.622018	0.657863	0.579767	2.48702e-05	0.202069	0.00982326	0.918899	0.000293376	0.898801	1.54251e-08	0.00140396	miB			NAN	0.00179752	0.764498	0.779282	0.493039	0.0198899	0.143499	0.189507	0.403111
	NAN	0.00179752	0.764498	0.779282	0.493039	0.0198899	0.143499	0.189507	0.403111	0.968913	0.914817	0.000890933	0.231547	0.279117	0.936091	0.459156	0.000246364	NAN			NAN	6.94334e-05	0.0205135	0.0023432	0.000634095	1.06698e-07	0.00940181	0.137019	0.0277457	0.0126534	0.000226262	0.867477	0.00444035	0.000377028	0.00560937	0.00146063	1.78758e-09	NAN				AA	AC	AG	AT	CA	CC	CG	CT
		AA	AC	AG	AT	CA	CC	CG	CT	GA	GC	GG	GT	TA	TC	TG	TT					AA	AC	AG	AT	CA	CC	CG	CT	GA	GC	GG	GT	TA	TC	TG	TT
Histone < 6.0 Å - Histone no contact		AA	AC	AG	AT	CA	CC	CG	CT	GA	GC	GG	GT	TA	TC	TG	TT			Histone < 6.0 Å - Histone no contact		AA	AC	AG	AT	CA	CC	CG	CT	GA	GC	GG	GT	TA	TC	TG	TT			Histone < 6.0 Å - Histone no contact		AA	AC	AG	AT	CA	CC	CG	CT
	AAA	NaN	1	NaN	1	0.470228	0.786648	NaN	NaN	NaN	0.211244	NaN	0.754632	NaN	NaN	NaN	0.746956	AAA			AAA	NaN	0.685106	NaN	1	0.0714139	0.225035	NaN	NaN	NaN	0.788405	NaN	0.321433	NaN	NaN	NaN	1	AAA			AAA	NaN	1	NaN	1	0.470228	0.786648	NaN	NaN
	A-B	0.165382	1	0.43036	0.0324292	1	0.615247	0.0330311	0.0301425	0.523232	NaN	0.523232	1	0.70044	0.926432	1	0.828434	A-B			A-B	0.0140322	1	0.0292616	0.172697	0.30042	0.418418	0.294335	0.011425	1	NaN	0.877836	1	0.991738	0.986157	0.289814	0.112206	A-B			A-B	0.165382	1	0.43036	0.0324292	1	0.615247	0.0330311	0.0301425
	B-A	0.589617	0.669883	0.173941	0.643199	0.627741	0.311424	1	0.675304	0.354237	0.381329	1	0.409556	0.889482	0.264961	0.839499	1	B-A			B-A	0.897416	1	0.562115	0.890753	0.652286	0.117339	1	0.349955	0.604358	0.384669	1	0.824393	0.898096	1	0.90827	0.946506	B-A			B-A	0.589617	0.669883	0.173941	0.643199	0.627741	0.311424	1	0.675304
	BBB	0.14383	0.017763	7.62573e-05	0.546222	0.3396	0.176926	0.147665	0.176926	0.404305	0.953817	0.00953684	0.034668	0.596973	0.000282637	0.788737	0.761798	BBB			BBB	0.0171218	1	0.0348579	0.029398	0.0313013	0.237139	0.0611496	0.2188	1	0.246009	0.000460974	0.810825	0.478571	0.0794109	0.142656	0.0829455	BBB			2B1	0.223145	0.874971	0.344265	0.990952	1	0.0754535	0.958964	0.58787
	2B1	0.223145	0.874971	0.344265	0.990952	1	0.0754535	0.958964	0.58787	1	0.487619	1	0.559071	0.874971	0.144235	0.608846	0.309708	2B1			2B1	0.406679	1	0.803811	0.743361	1	0.151219	0.713166	0.96131	0.725168	0.463644	1	0.307459	0.854014	0.964198	0.696279	0.633731	2B1			3B1	0.0975469	0.401431	0.401431	0.405837	0.739056	0.0571199	1	0.678153
	3B1	0.0975469	0.401431	0.401431	0.405837	0.739056	0.0571199	1	0.678153	1	1	1	0.804558	0.19972	0.842539	0.678153	1	3B1			3B1	0.189797	0.563607	0.00770244	0.403836	0.886069	0.152851	1	0.96131	0.501814	1	1	0.579124	0.2514	0.813803	0.487562	0.556743	3B1			B12	0.622441	0.812413	0.0880649	0.208335	0.912748	1	1	0.247968
	B12	0.622441	0.812413	0.0880649	0.208335	0.912748	1	1	0.247968	0.0483968	1	0.57497	0.643746	1	0.0507259	0.821676	0.0613596	B12			B12	0.574641	0.295604	1	0.61983	0.465119	0.281751	1	0.973055	0.47712	0.99626	0.558622	0.170774	0.979213	0.964198	1	0.0882935	B12			BB2	0.242599	0.543471	0.438576	1	0.112882	0.155267	1	0.42599
	BB2	0.242599	0.543471	0.438576	1	0.112882	0.155267	1	0.42599	0.116165	0.787052	0.976756	0.849542	1	0.653925	1	0.816914	BB2			BB2	0.0741741	1	1	0.531989	0.653976	0.37185	1	0.0011282	0.144824	0.416007	0.427493	0.303921	0.280331	0.741558	0.154824	1	BB2			miB	0.388213	0.407483	0.200997	1	0.354847	0.896611	0.642966	0.921483
	miB	0.388213	0.407483	0.200997	1	0.354847	0.896611	0.642966	0.921483	0.413964	0.532401	0.155465	0.0986668	0.497561	0.0381651	1	0.615832	miB			miB	0.181168	0.772433	0.048681	0.160295	0.874918	1	0.00900285	0.673624	0.0171199	1	0.000216804	0.0179935	0.0338268	0.103584	0.0327969	0.201342	miB			NAN	0.561654	1	0.00975667	0.202562	0.4364	0.185356	0.176025	0.0583126
	NAN	0.561654	1	0.00975667	0.202562	0.4364	0.185356	0.176025	0.0583126	0.00549323	0.540362	0.768488	0.874198	0.630446	0.0903474	0.358278	0.00668282	NAN			NAN	0.00148235	0.797321	1	0.00763958	0.00713292	0.121394	1	0.0356979	1	0.0670875	0.0148822	0.606475	0.852075	0.517762	0.597819	0.346005	NAN				AA	AC	AG	AT	CA	CC	CG	CT
		AA	AC	AG	AT	CA	CC	CG	CT	GA	GC	GG	GT	TA	TC	TG	TT					AA	AC	AG	AT	CA	CC	CG	CT	GA	GC	GG	GT	TA	TC	TG	TT
	Probability values (P values).																			Probability values, BBB not considered
	All data
Regulatory, < 6.0 Å		AA	AC	AG	AT	CA	CC	CG	CT	GA	GC	GG	GT	TA	TC	TG	TT			Regulatory, < 6.0 Å		AA	AC	AG	AT	CA	CC	CG	CT	GA	GC	GG	GT	TA	TC	TG	TT
	AAA	0.0446444	0.0165561	0.625494	1	0.00905486	1.69359e-12	0.000375616	3.67028e-06	9.40532e-05	0.0314291	1	0.140693	7.58729e-09	0.000883654	1.00837e-07	0.000184138	AAA			AAA	0.000913876	0.000515808	1	0.625144	0.00502014	5.12219e-10	6.85185e-05	2.74352e-05	0.000183691	0.0165164	1	0.2705	8.2198e-09	0.00121488	1.01311e-06	2.33136e-05	AAA
	A-B	1.40988e-06	1.16882e-08	0.00522491	0.001387	0.000942384	0.590897	5.27178e-08	1.19565e-46	0.0029178	1.22108e-08	0.546226	0.0229057	3.7955e-08	0.1771	0.812612	0.0607618	A-B			A-B	6.52237e-05	3.06516e-11	0.022805	0.000172196	0.00176779	0.228842	1.89531e-06	2.29464e-43	0.00568453	2.5786e-09	0.534385	0.00449879	4.05382e-08	0.231086	0.284304	0.118975	A-B
	B-A	1.62774e-06	2.20088e-43	0.734559	1.10479e-13	1.63932e-09	4.08013e-07	8.2596e-06	3.51876e-05	0.129775	4.32741e-07	0.00790499	0.0363395	4.86011e-13	0.000985858	1.12851e-11	0.0220791	B-A			B-A	0.000274865	4.20229e-30	0.679593	3.77425e-11	1.63507e-10	4.22906e-05	3.06198e-07	2.76999e-06	0.244864	1.91847e-06	0.0061042	0.00475358	5.75166e-14	0.000228605	4.2908e-10	0.00368624	B-A
	BBB	5.84936e-10	2.82413e-14	0.000391017	0.000761233	0.292551	0.000127539	0.00227952	0.0248375	0.0888979	0.152991	0.992251	0.0163001	0.680728	0.318616	2.4659e-05	0.0434606	BBB			2B1	0.777402	0.733513	1	5.03315e-13	7.17252e-08	0.182359	8.35239e-07	0.974598	0.000869998	0.0624043	1.30408e-06	0.0117176	0.00361748	3.07728e-07	6.52049e-05	3.21222e-24	2B1
	2B1	0.242335	0.0258151	0.415562	7.89645e-16	5.21766e-07	0.686652	2.42732e-05	0.681903	0.00033673	0.138926	2.82172e-06	0.0753909	0.00643208	3.33956e-06	2.19681e-06	5.06267e-20	2B1			3B1	0.0275171	0.418574	0.770363	2.02182e-13	7.75117e-08	0.197	1.27913e-05	0.0542878	0.00809845	0.00238377	0.0304541	1.84402e-06	1.94056e-09	0.400204	6.70959e-05	2.06835e-12	3B1
	3B1	0.490024	0.0124664	0.297153	4.27067e-16	3.86621e-07	0.627771	0.000158667	0.150302	0.00367599	0.000857471	0.0352785	6.25666e-05	6.95584e-09	0.555426	3.69691e-06	2.97475e-10	3B1			B12	0.000120935	3.65635e-06	0.137334	5.24369e-13	2.80126e-10	0.00445442	9.08255e-15	1.15092e-05	3.5865e-09	0.924725	3.58931e-06	8.43796e-05	0.196413	1.06685e-05	6.79907e-16	3.34566e-17	B12
	B12	0.02787	0.00111195	0.534299	6.09028e-11	9.98792e-11	0.0384955	1.18976e-17	9.41985e-05	1.36671e-07	0.931876	5.69415e-06	2.09512e-05	0.173338	7.86126e-06	3.84446e-11	1.51261e-17	B12			BB2	0.366275	1.58888e-08	0.0679679	6.62203e-15	2.46642e-40	1.65768e-07	7.32222e-11	3.41476e-13	1.5344e-36	0.905455	0.103137	1.96024e-10	1.81142e-19	5.27717e-08	3.75309e-17	3.97031e-17	BB2
	BB2	0.0464535	4.16267e-06	0.0171546	3.70155e-13	4.72511e-41	3.27104e-06	4.34466e-13	4.77644e-12	3.00079e-32	0.696131	0.107274	6.6279e-11	2.56926e-19	4.43396e-08	1.20022e-12	1.9547e-17	BB2			miB	0.850191	4.60853e-05	0.92338	0.0392507	0.156642	0.833825	0.93084	0.0799485	0.621755	0.0990745	1	0.0338158	0.00148816	2.62082e-05	0.100784	0.018995	miB
	miB	0.249745	2.68696e-08	0.764118	0.116938	0.112891	0.410957	0.846921	0.033096	0.453796	0.05915	1	0.0155877	0.00205852	8.17717e-05	0.0269421	0.00945525	miB			NAN	0.560194	0.199692	0.168497	0.0197784	0.325769	0.196024	0.373733	0.364302	0.0101731	0.898695	6.45252e-05	0.481288	0.4852	0.590336	0.00152532	4.50663e-06	NAN
	NAN	0.0175471	0.000317744	0.8452	0.198915	0.53104	0.01473	0.0711487	0.117337	0.0035193	0.835242	0.000128202	0.168232	0.423607	0.41529	0.104548	9.20877e-07	NAN				AA	AC	AG	AT	CA	CC	CG	CT	GA	GC	GG	GT	TA	TC	TG	TT
		AA	AC	AG	AT	CA	CC	CG	CT	GA	GC	GG	GT	TA	TC	TG	TT
Histones, < 6.0 Å		AA	AC	AG	AT	CA	CC	CG	CT	GA	GC	GG	GT	TA	TC	TG	TT			Histones, < 6.0 Å		AA	AC	AG	AT	CA	CC	CG	CT	GA	GC	GG	GT	TA	TC	TG	TT
	AAA	0.820231	0.0235786	1	1	0.951016	0.734721	1	1	0.94106	0.03602	1	1	1	1	0.938595	1	AAA			AAA	0.891369	0.0334385	1	1	0.839356	0.779455	1	1	0.839356	0.0290804	1	1	1	1	0.891369	1	AAA
	A-B	0.0309517	0.380294	0.0425759	0.113508	0.630129	0.835833	8.61079e-06	0.198788	0.174662	0.111369	0.477011	0.724814	0.0273404	0.264509	0.186723	1	A-B			A-B	0.0499357	0.316309	0.0718059	0.0919249	1	0.958655	3.97434e-05	0.29219	0.0897826	0.122497	0.524211	0.746194	0.0224451	0.340167	0.27921	0.649927	A-B
	B-A	1	1.51691e-05	0.549223	0.754812	0.176991	0.0687439	0.512711	0.703742	0.0820761	1	1	0.0203334	0.128696	0.545181	0.0802604	0.547678	B-A			B-A	0.709655	6.3611e-05	0.92965	0.676764	0.0598038	0.115286	0.401946	0.901189	0.0274857	0.958155	0.944553	0.0157318	0.133539	0.335288	0.0483086	0.999271	B-A
	BBB	0.00942678	0.207543	0.00114876	0.587597	2.10444e-05	0.224099	0.204101	0.127317	0.00010962	0.465136	0.482581	0.847183	0.807836	0.0725702	0.0926228	0.000154855	BBB			2B1	1	0.309037	0.257931	0.000531274	0.00211447	0.0125559	0.989644	0.34365	0.00568879	0.855113	0.071645	0.0116584	0.416655	0.260479	0.0574923	1.91805e-10	2B1
	2B1	0.680313	0.205031	0.117151	0.00104525	0.009505	0.0190725	1	0.475614	0.0213165	0.756553	0.0618679	0.0155338	0.459521	0.459521	0.0977385	2.53028e-07	2B1			3B1	0.264373	0.55386	0.306694	1.95574e-08	0.0886819	0.472439	0.152871	0.401297	0.165363	0.337869	0.950942	0.00166208	0.595694	0.410429	0.0357676	0.0101852	3B1
	3B1	0.141674	0.694999	0.145412	7.39223e-08	0.255043	0.597642	0.207013	0.542495	0.395509	0.292004	0.853209	0.0024339	0.641165	0.641165	0.0616582	0.0853259	3B1			B12	0.00546169	0.163613	0.00154505	5.66466e-05	0.192891	0.446929	0.781858	0.0189278	1.34763e-09	0.699595	0.576008	1	0.420644	0.119775	1	0.00102074	B12
	B12	0.0686717	0.301264	0.057848	6.45155e-05	0.0114585	0.681962	1	0.0532841	1.7264e-13	0.560041	0.752034	0.945665	0.391516	0.0547554	0.652009	7.85477e-05	B12			BB2	0.639048	5.88316e-05	1	9.03263e-09	9.14478e-10	0.0440771	0.191362	0.00102211	0.574701	0.0007281	0.0639078	0.00652687	0.729777	0.0020777	0.000248249	1.20452e-06	BB2
	BB2	0.236019	0.000289207	0.462318	1.93893e-08	2.4253e-14	0.0174204	0.356471	0.000172568	0.0881866	0.00345378	0.130181	0.0076957	0.815064	0.000889561	3.4551e-05	7.28156e-08	BB2			miB	0.485061	0.19556	0.6907	0.0837071	0.120104	0.19789	0.480686	0.94331	0.785822	0.513585	0.471696	0.385359	0.860794	1	0.799919	0.747516	miB
	miB	1	0.0987511	0.79334	0.134635	0.599513	0.338482	0.284454	0.954502	0.613779	0.408671	0.377684	0.365688	0.800645	0.800645	0.481456	0.620042	miB			NAN	0.291068	0.183821	0.472757	0.507767	0.197455	0.452736	0.461993	0.964981	0.465184	0.404227	1	0.323852	0.753338	0.00437984	0.63492	0.17099	NAN
	NAN	0.0734295	0.0815658	0.0938531	0.667801	1	0.248798	0.242294	0.823865	0.759864	0.302623	0.86728	0.308866	0.689547	0.0502999	1	1	NAN				AA	AC	AG	AT	CA	CC	CG	CT	GA	GC	GG	GT	TA	TC	TG	TT
		AA	AC	AG	AT	CA	CC	CG	CT	GA	GC	GG	GT	TA	TC	TG	TT
Regulatory, no contact with protein		AA	AC	AG	AT	CA	CC	CG	CT	GA	GC	GG	GT	TA	TC	TG	TT			Regulatory, no contact with protein		AA	AC	AG	AT	CA	CC	CG	CT	GA	GC	GG	GT	TA	TC	TG	TT
	AAA	0.236253	0.908468	1	1	0.651108	0.176617	0.54078	0.961995	1	0.0395192	1	0.634027	0.902091	0.997663	0.386232	0.368165	AAA			AAA	0.386156	0.816081	1	0.955873	0.938792	0.200316	0.634248	0.958064	1	0.0419054	1	0.690933	1	0.934871	0.328824	0.37303	AAA
	A-B	0.0131301	0.149967	0.0779035	0.103095	0.0112286	0.747787	0.497073	1.84934e-11	0.21156	0.628385	0.668709	0.272885	0.147274	0.797683	0.756387	0.031067	A-B			A-B	0.0432874	0.111093	0.0993307	0.0721008	0.0793965	0.810481	0.635937	1.09893e-11	0.235506	0.608582	0.740986	0.33514	0.192401	0.891958	0.58099	0.0273196	A-B
	B-A	0.0265107	1.93228e-07	0.171488	8.34166e-05	0.107309	0.273603	0.0226771	0.12182	1	0.00927401	0.0557851	0.111502	0.0602686	0.633918	0.0166338	0.70603	B-A			B-A	0.175976	1.8103e-06	0.0688098	0.000392304	0.0193619	0.33079	0.0130408	0.116686	0.968698	0.00950833	0.06712	0.0809931	0.0985242	0.481702	0.00673802	0.670728	B-A
	BBB	4.09882e-07	0.120927	0.118384	0.103747	3.2785e-06	0.607685	0.183005	1	0.487485	0.906703	0.448929	0.445077	0.104622	0.372064	0.044081	0.89825	BBB			2B1	0.0311315	0.765186	0.625181	0.00218933	3.90922e-05	0.346704	0.00714963	1	0.0763973	0.00228281	0.581937	0.0199943	0.538601	0.00220465	0.0810847	0.0106462	2B1
	2B1	0.402309	1	0.422603	0.00054163	0.00053498	0.285094	0.0137064	1	0.0633121	0.00310351	0.481841	0.0114938	0.351069	0.00695728	0.173802	0.0144093	2B1			3B1	0.403633	0.228491	0.213236	0.0529378	0.0445133	0.841946	0.458894	0.505732	0.0107573	0.392087	0.866369	0.000977096	0.207793	0.459844	0.0946715	0.0191517	3B1
	3B1	0.98424	0.120467	0.138201	0.0215418	0.208077	0.748729	0.629714	0.522422	0.00942869	0.421948	0.742941	0.000460605	0.130866	0.370136	0.186365	0.0243846	3B1			B12	0.53844	0.00864085	0.0631332	0.00339088	0.174421	0.0627938	0.00565456	0.499007	0.00105973	0.517855	0.000567668	0.0837511	0.0110149	0.345395	0.0338155	0.00801266	B12
	B12	0.0972203	0.0203514	0.172753	0.00950215	0.0125019	0.0853191	0.00158661	0.501672	0.00316885	0.555763	0.0020459	0.120877	0.0463449	0.268091	0.0081265	0.00876799	B12			BB2	1	0.291928	0.0939095	0.00853489	1.28865e-13	0.300416	8.92992e-07	0.0614099	0.164458	0.793657	0.63269	0.350654	0.293589	0.0668567	0.000431978	0.000357962	BB2
	BB2	0.437096	0.406978	0.067271	0.0153761	8.01364e-19	0.343452	9.39276e-08	0.0638073	0.223392	0.82081	0.745676	0.41598	0.20925	0.0559059	6.17731e-05	0.000396122	BB2			miB	1	0.680034	0.485031	0.879385	0.965956	0.10689	0.60255	0.163543	0.018721	0.669659	0.236973	0.137602	0.543217	0.796631	0.0464403	0.859828	miB
	miB	0.36582	0.931345	0.323533	0.615889	0.536297	0.137553	0.809377	0.16955	0.0369383	0.642485	0.342367	0.186948	0.828356	0.655598	0.0127164	0.832272	miB			NAN	0.585814	0.924173	0.29889	0.172371	1	0.506211	0.640854	1	0.256497	0.29889	0.189782	0.779004	0.117799	1	1	0.765466	NAN
	NAN	0.153219	0.460614	0.800524	0.530751	0.0809317	0.386051	1	1	0.184163	0.295887	0.131453	1	0.488338	0.782971	0.429694	0.726798	NAN				AA	AC	AG	AT	CA	CC	CG	CT	GA	GC	GG	GT	TA	TC	TG	TT
		AA	AC	AG	AT	CA	CC	CG	CT	GA	GC	GG	GT	TA	TC	TG	TT
Histones no contact with protein		AA	AC	AG	AT	CA	CC	CG	CT	GA	GC	GG	GT	TA	TC	TG	TT			Histones no contact with protein		AA	AC	AG	AT	CA	CC	CG	CT	GA	GC	GG	GT	TA	TC	TG	TT
	AAA	0.591371	0.03188	1	1	0.110726	0.00248431	1	0.675403	0.890478	0.882587	0.906587	0.365407	0.837394	0.485983	0.629168	0.560554	AAA			AAA	0.618235	0.0233106	1	1	0.197169	0.00356499	1	0.638546	0.868493	0.912347	0.818	0.287098	0.879149	0.533278	0.598723	0.645503	AAA
	A-B	1	0.0902935	1	0.0719996	0.401048	0.44721	0.957834	1.48619e-07	0.13809	0.134206	0.146216	0.539381	0.449857	0.127209	0.153883	0.28581	A-B			A-B	1	0.102149	1	0.0725851	0.714902	0.520288	0.772763	5.70374e-07	0.124508	0.146032	0.102149	0.677403	0.355005	0.17145	0.200334	0.127123	A-B
	B-A	0.835973	0.000840461	0.345118	0.497644	0.111778	0.41633	0.957834	0.369427	0.13809	0.124262	1	0.00680356	0.678711	0.503354	0.124476	1	B-A			B-A	0.922416	0.000330872	0.348441	0.476864	0.058038	0.364625	0.772763	0.308104	0.124508	0.0926855	1	0.00178913	0.767641	0.350348	0.102397	0.990466	B-A
	BBB	0.429264	0.409035	1	0.915189	0.000558958	0.459398	0.0588069	0.301775	0.681587	0.557393	0.0298672	0.0975832	0.360894	0.0961156	0.379285	0.00843199	BBB			2B1	0.192407	0.333192	0.294777	0.129344	0.0356321	0.526925	0.782892	0.773398	0.596607	0.432607	0.219565	1	0.217643	0.146759	0.0675663	0.00925893	2B1
	2B1	0.166672	0.421186	0.292466	0.141324	0.0750545	0.598068	0.564862	0.88811	0.644714	0.507654	0.317754	1	0.297827	0.251549	0.0847004	0.0414698	2B1			3B1	0.0216618	0.744537	0.0552342	0.0801563	0.0792087	0.230768	0.617313	0.701843	1	0.292407	0.831708	0.34252	0.256456	1	0.585045	0.0141714	3B1
	3B1	0.0189384	0.854187	0.0626557	0.0891873	0.162225	0.182997	0.796432	0.814945	0.972278	0.264361	1	0.518275	0.219175	0.833104	0.675053	0.0585253	3B1			B12	0.000713258	0.110472	0.323197	0.092411	0.601309	0.143702	1	0.346123	0.0013668	1	0.69573	0.266125	0.923874	0.559657	0.393612	0.88604	B12
	B12	0.00211862	0.0883157	0.352722	0.092419	0.213143	0.19293	1	0.465375	0.000956664	0.937523	1	0.168739	0.769828	0.372791	0.294168	0.93624	B12			BB2	0.20532	0.0991143	0.836592	0.000369592	3.36639e-10	0.0380279	0.964274	0.672536	1	0.0165921	0.608785	0.0431224	1	0.017697	0.0241217	0.059012	BB2
	BB2	0.168406	0.0811713	0.863548	0.000421642	2.35206e-13	0.0250613	1	0.82122	1	0.0297518	0.342317	0.0280358	1	0.0106182	0.0143212	0.02663	BB2			miB	1	0.509912	0.449441	0.543472	0.00760727	0.00511729	0.015711	0.266293	0.180698	0.0842865	0.118795	0.277191	0.274597	0.783196	0.341852	1	miB
	miB	0.859178	0.382002	0.498704	0.597121	0.0698814	0.0116357	0.00189998	0.429824	0.144411	0.0692161	0.0249407	0.614325	0.464391	1	0.227692	0.481223	miB			NAN	0.393918	0.597327	0.0780474	0.0841893	0.795793	0.213558	0.335661	0.276123	0.153287	0.882977	0.597327	0.287931	0.29622	0.144796	0.185737	0.0177799	NAN
	NAN	0.615426	0.855858	0.0872751	0.11733	0.15955	0.138946	0.739397	0.15276	0.22926	1	0.201236	0.127981	0.196948	0.445581	0.333273	0.00296598	NAN				AA	AC	AG	AT	CA	CC	CG	CT	GA	GC	GG	GT	TA	TC	TG	TT
		AA	AC	AG	AT	CA	CC	CG	CT	GA	GC	GG	GT	TA	TC	TG	TT
Regulatory, < 3.2 Å		AA	AC	AG	AT	CA	CC	CG	CT	GA	GC	GG	GT	TA	TC	TG	TT			Regulatory, < 3.2 Å		AA	AC	AG	AT	CA	CC	CG	CT	GA	GC	GG	GT	TA	TC	TG	TT
	AAA	0.00468329	0.0580332	0.856588	0.690105	0.0852341	1.6293e-06	0.000443955	1.03379e-06	8.42924e-05	0.0198869	0.873652	0.0209626	2.15772e-09	0.000233822	1.47233e-07	8.48228e-05	AAA			AAA	6.97895e-05	0.00415049	0.886442	1	0.0927539	3.7793e-05	0.0001115	1.74652e-05	0.000234653	0.00891717	0.927258	0.0307722	6.6516e-09	0.000244968	1.51287e-06	1.07078e-05	AAA
	A-B	1.76964e-05	1.64953e-06	0.032196	0.0227698	0.00209031	1	2.68474e-09	2.10683e-27	0.00244021	7.72841e-08	0.520143	0.0940791	9.78206e-09	0.394253	0.977903	0.0389234	A-B			A-B	0.00026188	2.04852e-08	0.0813569	0.00537182	0.00122786	0.626883	5.54962e-08	3.53253e-24	0.00638108	1.57078e-08	0.558109	0.0505529	2.90789e-08	0.442512	0.532404	0.0718378	A-B
	B-A	0.00106794	5.11527e-27	0.555247	1.26889e-13	8.71831e-06	6.34901e-07	2.08719e-05	0.000365204	0.213777	2.20756e-08	0.00890626	0.0156644	1.50506e-10	0.00537324	2.99407e-11	0.607579	B-A			B-A	0.0212088	1.12144e-18	1	2.08649e-11	6.71499e-06	2.90026e-05	1.74235e-06	2.60038e-05	0.468826	1.51855e-07	0.00895067	0.00476759	9.81314e-12	0.00245783	9.10961e-10	0.326664	B-A
	BBB	2.09012e-06	5.30364e-10	0.00982392	0.00393967	0.699068	0.00203319	0.0256349	0.00636571	0.0217187	0.115042	0.733702	0.255107	0.252703	0.607609	5.19251e-05	0.0851459	BBB			2B1	0.725269	0.500698	0.296193	6.33163e-08	0.000165366	0.617486	8.48463e-05	1	0.000519316	0.165101	1.63017e-05	0.0407388	0.000269512	7.61298e-07	0.000602346	8.46905e-21	2B1
	2B1	0.448745	0.0236837	0.103155	8.79789e-10	0.000189482	0.889021	0.000743188	0.494941	0.00012447	0.331621	2.15586e-05	0.0968449	0.00104732	3.931e-06	2.88261e-05	2.51524e-17	2B1			3B1	0.294732	0.400709	0.959767	3.16521e-05	4.40962e-05	0.687198	4.74007e-06	0.0279312	0.0066204	0.000339373	0.124452	2.72242e-07	1.29204e-09	0.0602499	0.00216768	1.5589e-10	3B1
	3B1	1	0.0262249	0.543641	1.46476e-06	4.94921e-05	0.91717	3.45339e-05	0.102172	0.00215462	8.80936e-05	0.115404	2.60935e-06	9.01446e-09	0.0884803	0.000194427	7.9079e-09	3B1			B12	0.000677059	0.00801957	0.0270213	8.23189e-10	0.0843384	0.0101329	2.57859e-11	0.000155988	2.5464e-06	0.793078	0.000258261	0.00225863	0.349743	1.75227e-05	5.54485e-20	1.95618e-14	B12
	B12	0.0291692	0.125747	0.119724	2.08456e-08	0.111276	0.0471977	5.08885e-13	0.00106825	6.7601e-05	0.553855	0.000497492	0.00144202	0.243447	1.82684e-05	1.30565e-14	1.14619e-14	B12			BB2	0.68152	5.40781e-07	0.262752	1.01322e-10	1.4956e-22	7.53147e-07	3.15107e-10	1.86817e-10	6.56569e-38	0.938267	0.0104076	9.79823e-10	5.81214e-17	4.0889e-07	7.37297e-12	1.76767e-15	BB2
	BB2	0.20122	3.31989e-05	0.12028	1.93954e-09	3.06366e-21	7.59933e-06	8.85264e-12	2.40435e-09	3.54852e-32	0.956766	0.0149703	8.37592e-10	1.34276e-17	4.63008e-07	1.63884e-08	1.14297e-15	BB2			miB	0.486345	0.000121277	0.47929	0.109045	0.425788	0.602626	0.894492	0.0635623	0.621457	0.0113429	1	0.055525	0.00842113	0.000114485	0.383111	0.0122669	miB
	miB	0.173671	4.76515e-07	0.287473	0.22913	0.47173	0.31767	1	0.0208027	0.41296	0.00515202	1	0.0413304	0.013786	0.000211996	0.153776	0.00706135	miB			NAN	0.228494	0.742865	0.0723989	0.0927252	0.517621	0.950903	0.442897	0.122109	0.0753377	0.0544645	0.000783968	0.685212	0.398438	0.459829	0.0122455	0.00158044	NAN
	NAN	0.0140687	0.0340009	0.359156	0.405739	0.620706	0.479543	0.15858	0.0201114	0.0205576	0.154701	0.00196463	0.473067	0.248431	0.389374	0.260287	0.00050902	NAN				AA	AC	AG	AT	CA	CC	CG	CT	GA	GC	GG	GT	TA	TC	TG	TT
		AA	AC	AG	AT	CA	CC	CG	CT	GA	GC	GG	GT	TA	TC	TG	TT
											2.5e-09
[truncated: 27 more columns]
